# Supplementary material for: Mondo complexes regulate TFEB via TOR inhibition to promote longevity in response to gonadal signals
Source: PubMed Central journal article supplement (PMC4804169; doi:10.1038/ncomms10944), 2016-03-22
Supplement: ncomms10944-s1.pdf [file ncomms10944-s1.pdf]

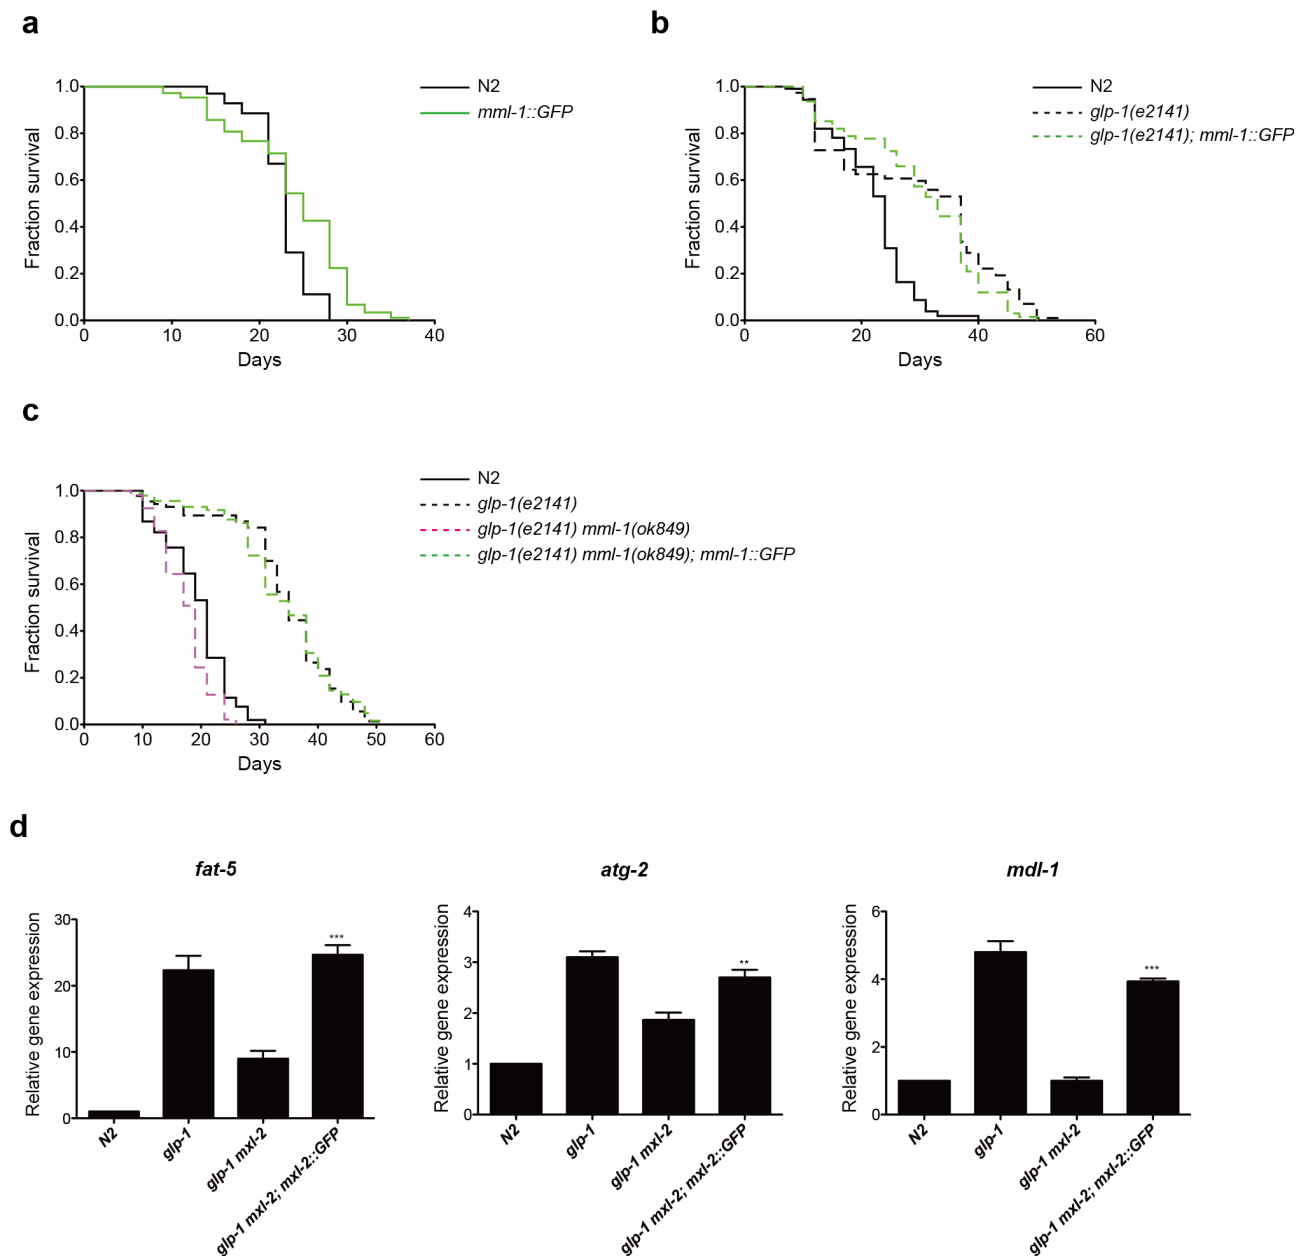

**Supplementary Figure 1: MML-1 Overexpression Modestly Extends Wild Type Lifespan.**

(a) *mml-1* overexpression modestly but significantly extends wild type lifespan (3/6 biological replicates). (b) *mml-1* overexpression does not further extend *glp-1* longevity. (c) MML-1::GFP rescues the short-lived phenotype of *glp-1mml-1*. See Supplementary Table 1 for details and repeats (a-c). (d) MXL-2::GFP rescues the expression of *mml-1/mxl-2* preferential target genes (See Fig.6c and Supplementary fig. 6d). The bars indicate mean  $\pm$  s.e.m. from three biological replicates. P value relative to *glp-1mxl-2* (\*\*P< 0.01, \*\*\*P< 0.001) was determined by *t*-test.

**a**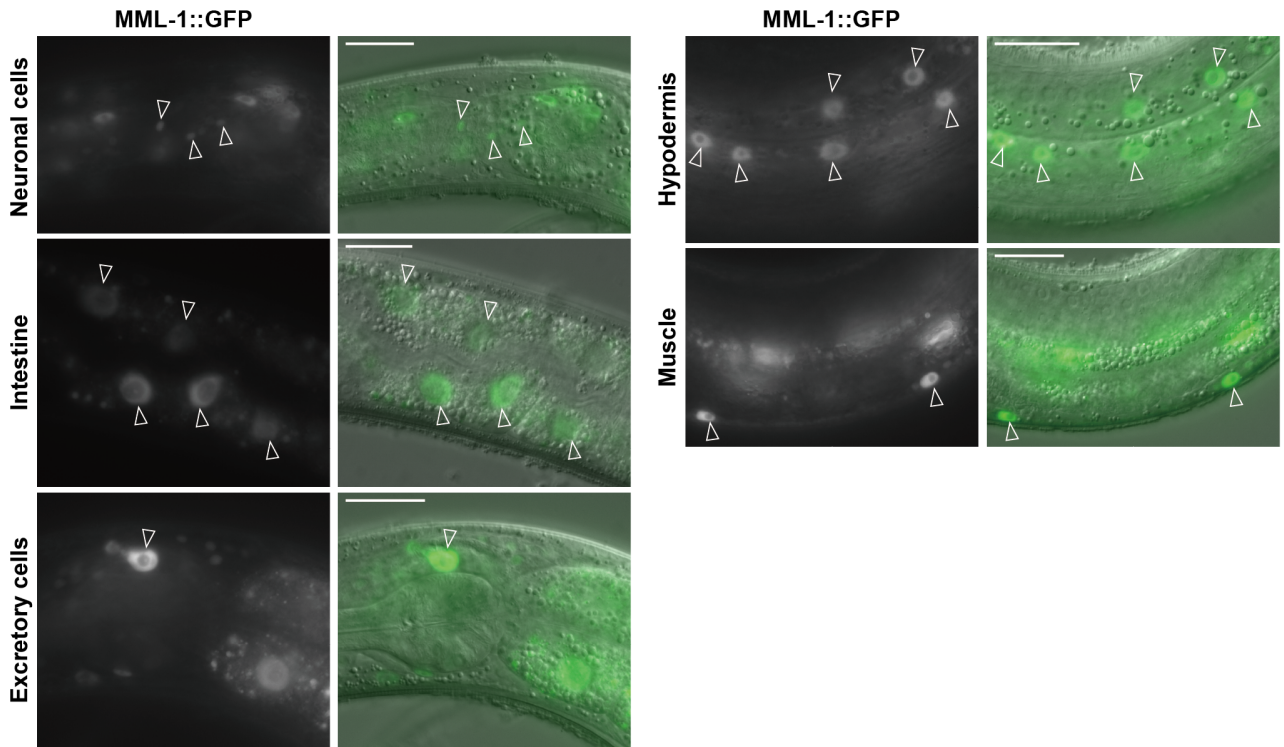**b**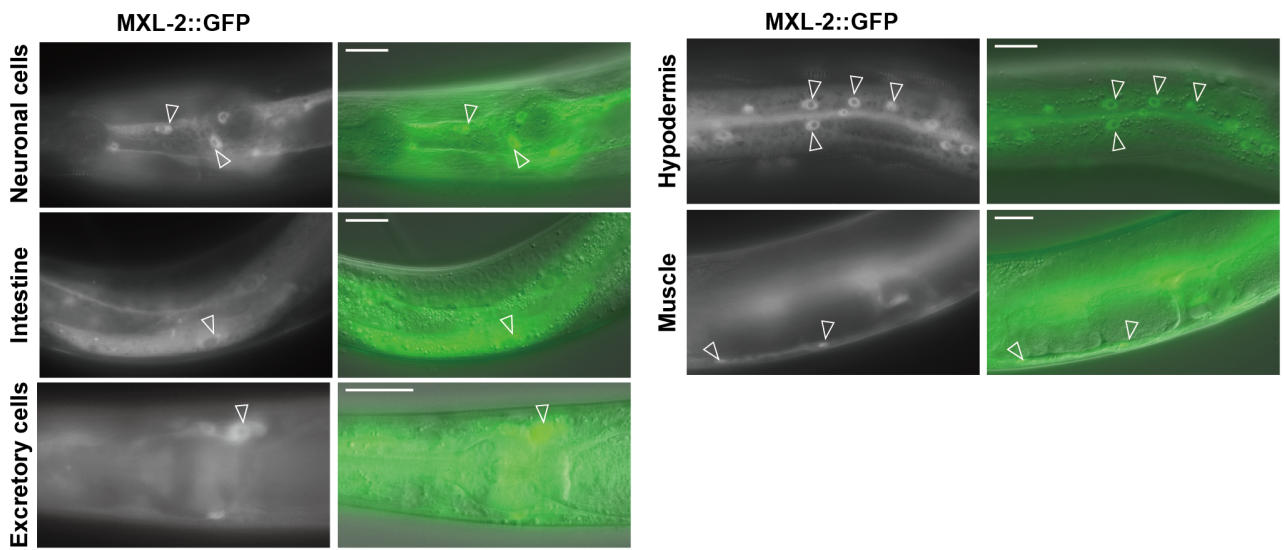**c**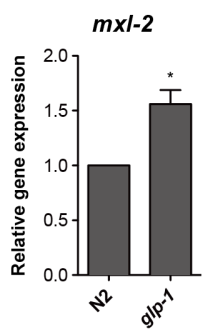**d**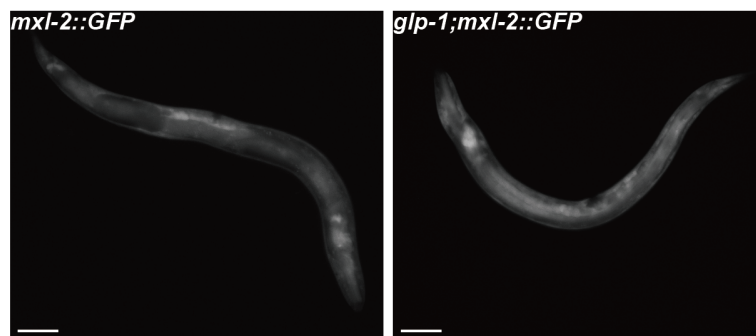**e**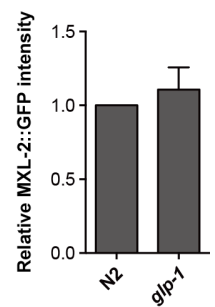

### Supplementary Figure 2: MML-1 and MXL-2 Expression Patterns.

(a) MML-1::GFP expression patterns at day1 adult stage. MML-1::GFP is found in the nucleus (empty arrowheads) of neuronal cells, intestine, excretory cells, hypodermis and muscle, but also found in the cytoplasmic region at higher magnification (Fig. 2a). (b) MXL-2::GFP expression pattern at day1 adult stage. MXL-2::GFP is smoothly distributed in neuronal cells, intestine, excretory cells, hypodermis and muscle (empty arrowheads). (c) qRT-PCR analysis of *mxl-2* transcripts. *mxl-2* is slightly upregulated in *glp-1* worms. The bars indicate mean  $\pm$  s.e.m. from three biological replicates. P value (\*P < 0.05) was determined by *t*-test. (d) The representative fluorescent images of MXL-2::GFP at day1 adult stage in N2 and *glp-1* background. (e) The quantification of MXL-2::GFP. The bars indicate mean  $\pm$  s.e.m. from three biological replicates (>20 worms each). P value (P > 0.05) was determined by *t*-test. Scale bars, 20 $\mu$ m (a and b); 50 $\mu$ m (d).

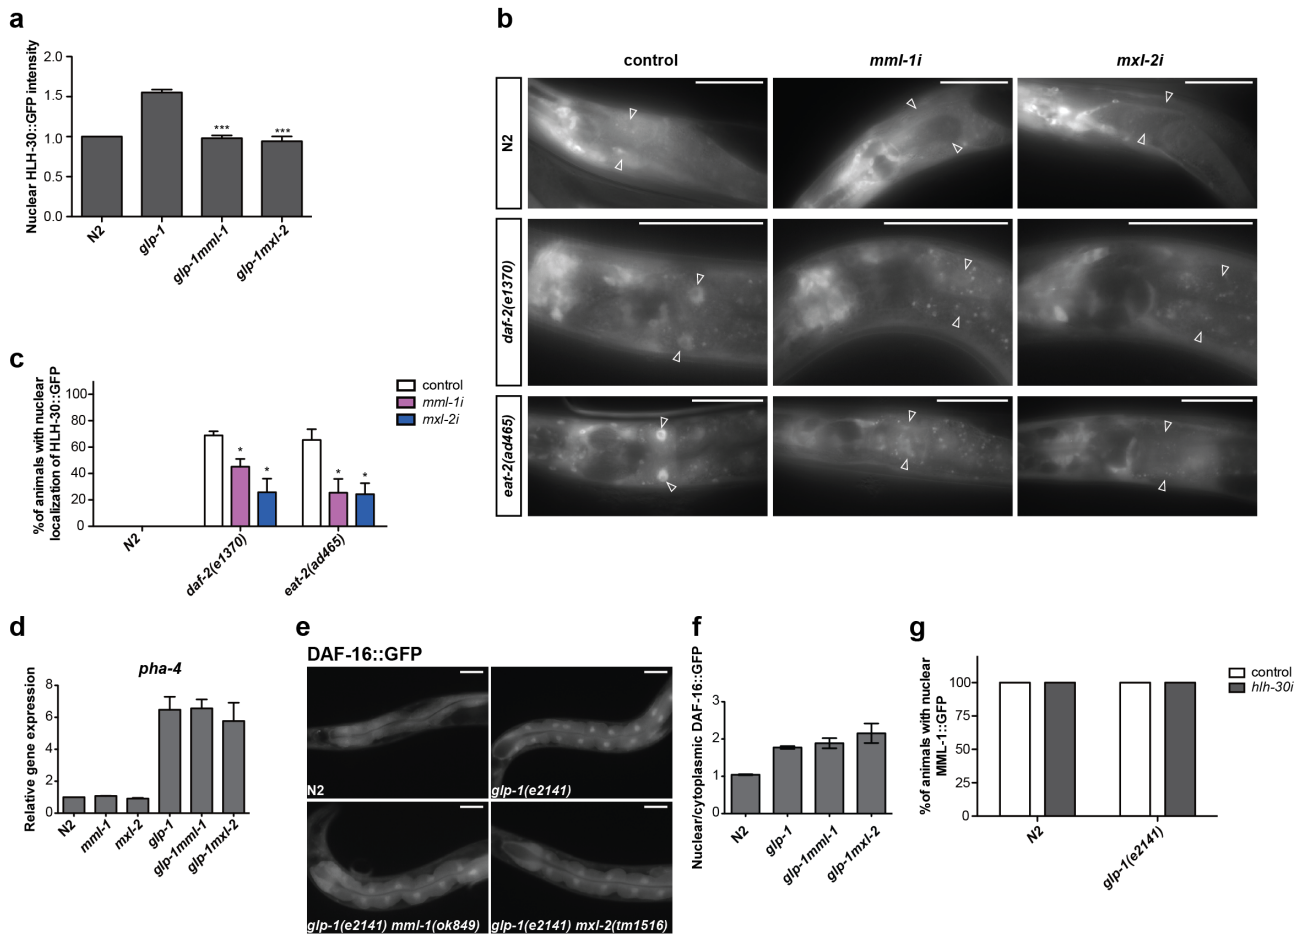

### Supplementary Figure 3: MML-1/MXL-2 affects HLH-30 nuclear localization.

(a) The quantification of HLH-30::GFP intensity in the nucleus of day1 adult worms. The bars indicate mean  $\pm$  s.e.m. from three biological replicates. P value (\*\*\*) $P < 0.001$  was determined by *t*-test relative to *glp-1*. (b) The representative pictures of HLH-30::GFP in day 1 adult stage wild type (N2), *daf-2* (*e1370*) and *eat-2* (*ad465*) background upon control, *mml-1* and *mxl-2* RNAi. HLH-30::GFP is localized in the anterior intestine in *daf-2* and *eat-2*, but these nuclear localization are impaired upon *mml-1* or *mxl-2* knockdown (arrowheads). We noticed that HLH-30::GFP levels are low in *daf-2* and *eat-2* background compared to wild type, therefore we took these pictures at different exposure time (N2, 100ms; *daf-2*, 500ms; *eat-2*, 300ms) (c) The quantification of HLH-30::GFP nuclear localization. The bars indicate mean  $\pm$  s.e.m. from three biological replicates. P value (\* $P < 0.05$ ) was determined by *t*-test. (d) qRT-PCR analysis of *pha-4* transcripts in indicated genotypes. The bars indicate mean  $\pm$  s.e.m. from three biological replicates relative to N2. *pha-4* levels are not changed in *glp-1mml-1* and *glp-1mxl-2* compared to *glp-1*. P value (\* $P > 0.05$ ) was determined by one-way ANOVA with Tukey's test relative to *glp-1*. (e) The representative fluorescent pictures of DAF-16::GFP in the intestine at day1 adult. DAF-16 nuclear localization is maintained in *glp-1mml-1* and *glp-1mxl-2*. (f) The quantification of DAF-16 nuclear localization. The ratios of fluorescence intensity in the nucleus and the cytoplasm are shown. The bars indicate mean  $\pm$  s.e.m. from three biological replicates (>20 worms each). P value ( $P > 0.05$ ) was determined

by *t*-test relative to *glp-1*. (g) The quantification of numbers of day 1 adult stage worms containing nuclear MML-1::GFP in N2 and *glp-1* strains upon control and *hlh-30* RNAi knockdown. In wild type background, MML-1::GFP is also present in the nucleus, albeit weakly. Scale bars, 50 $\mu$ m (b and e).

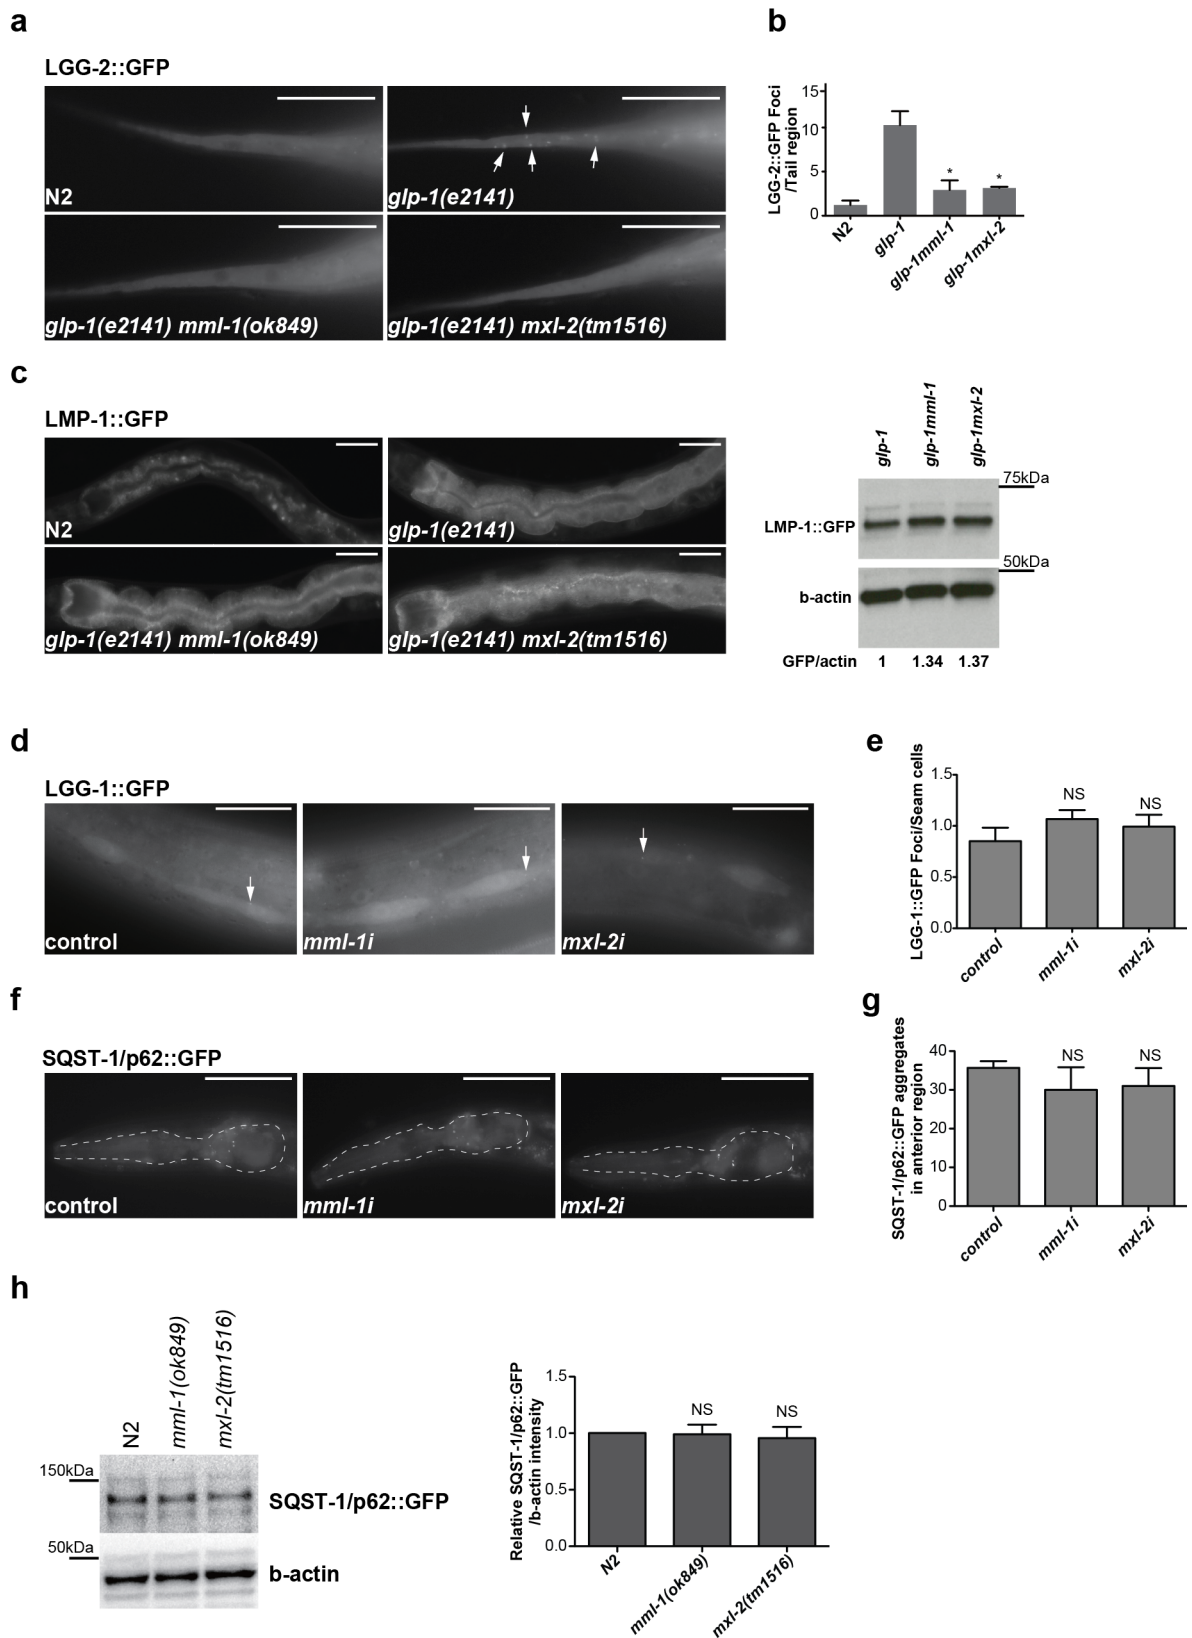

#### Supplementary Figure 4: MML-1/MXL-2 does not affect autophagy in wild type.

(a) The representative pictures showing LGG-2::GFP puncta (arrows) in indicated genotypes at L4 stage. (b) The quantification of LGG-2::GFP puncta in the tail region. The bars indicate mean  $\pm$  s.e.m. from three biological replicates (>20 worms each). P value (\* $P < 0.05$ ) was determined by *t*-test. (c) Representative fluorescent images of LMP-1::GFP of day1 adult worms (left). The LMP-

1::GFP was quantified by Western Blot (right). GFP bands were normalized to housekeeping gene b-actin bands. LMP-1::GFP levels were slightly upregulated in *glp-1mml-1* vs *glp-1mxl-2*. The results were reproduced in three independent experiments. (d) Representative LGG-1::GFP images at L4 stage upon control, *mml-1* and *mxl-2* RNAi. (e) Quantification of LGG-1::GFP puncta in seam cells. The bar represents mean  $\pm$  s.e.m. from three biological replicates (>20 worms each) (*t*-test, NS [Not Significant]). *mml-1/mxl-2* knockdown by RNAi did not affect the numbers of LGG-1 foci. (f) Representative SQST-1/p62::GFP images at L4 stage upon control, *mml-1* and *mxl-2* RNAi (g) Quantification of SQST-1/p62::GFP aggregates in the pharyngeal region. The bar represents mean  $\pm$  s.e.m. from three experiments (>20 worms each) (*t*-test, NS). (h) Representative Western Blot showing SQST-1::GFP and b-actin (left) and the quantification of blot (right) (*t*-test, NS). The results were reproduced in three independent experiments. Scale bars, 50 $\mu$ m (a and f); 20 $\mu$ m (c and d).

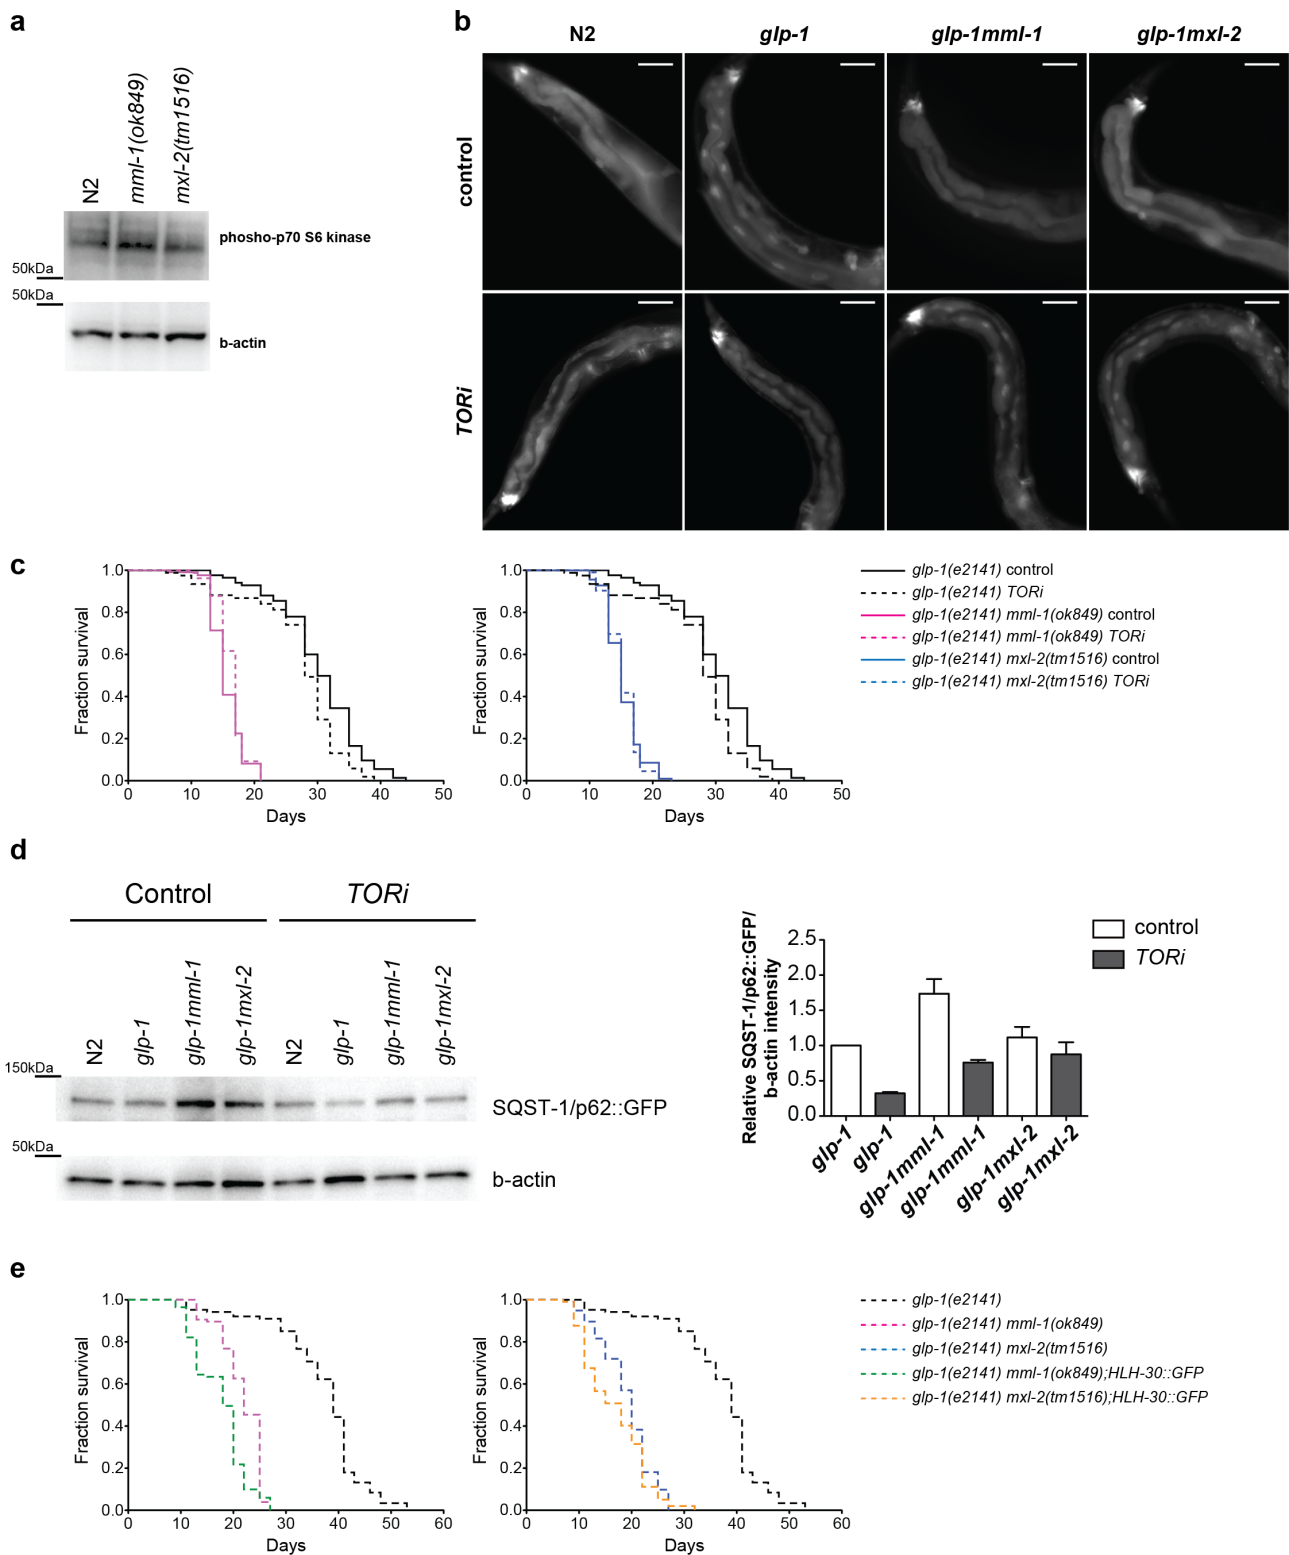

**Supplementary Figure 5: HLH-30 Nuclear Localization is Not Sufficient to Rescue the Short-Lived Phenotype of *glp-1mml-1* and *glp-1mxl-2*.**

(a) A representative Western Blot showing phosphorylation of p70 S6 kinase and b-actin. The phosphorylation of p70 S6 kinase did not change in *mml-1* and *mxl-2* mutants. The results were reproduced in three independent experiments. (b) Representative fluorescent pictures of HLH-30::GFP at day1 adult stage after treatment with control or TOR RNAi clones. TOR knockdown was carried out from egg onwards. TOR knockdown restores HLH-30 nuclear localization in *glp-*



*Imml-1* and *glp-1mxl-2*. (c) TOR knockdown does not rescue the short-lived phenotype of *glp-1mml-1* and *glp-1mxl-2*. (d) A representative Western Blot showing SQST-1/p62::GFP and b-actin in indicated genotypes and conditions (left). The quantification of Western Blot analysis (right). The bars indicate mean  $\pm$  s.e.m. from three biological replicates relative to *glp-1*. GFP intensity was normalized to the loading control, b-actin. TOR knockdown does not fully restore autophagy in *glp-1mml-1* and *glp-1mxl-2*. (e) HLH-30 overexpression does not rescue the shortevity of *glp-1mml-1* and *glp-1mxl-2*. See Supplementary Table 1 for details and repeats (c, e). Scale bars, 50 $\mu$ m (b).

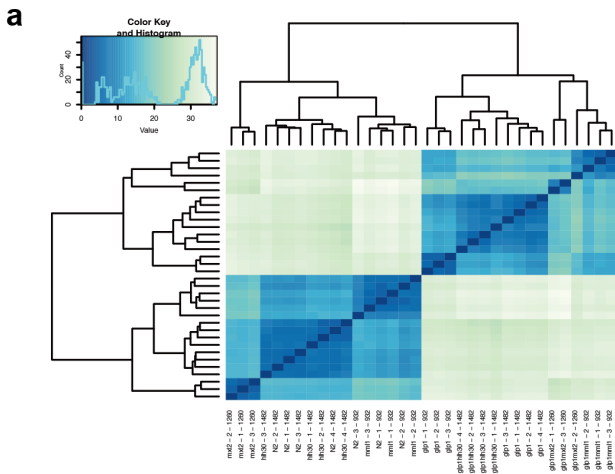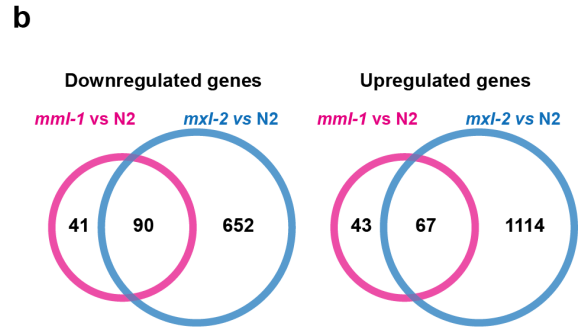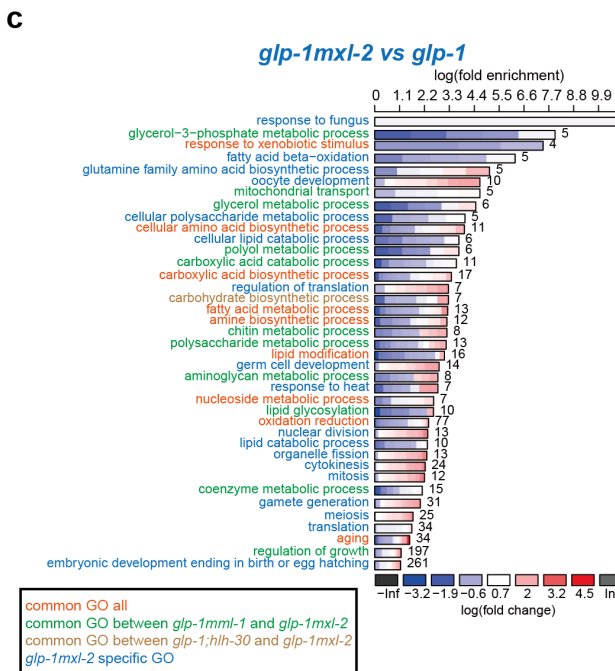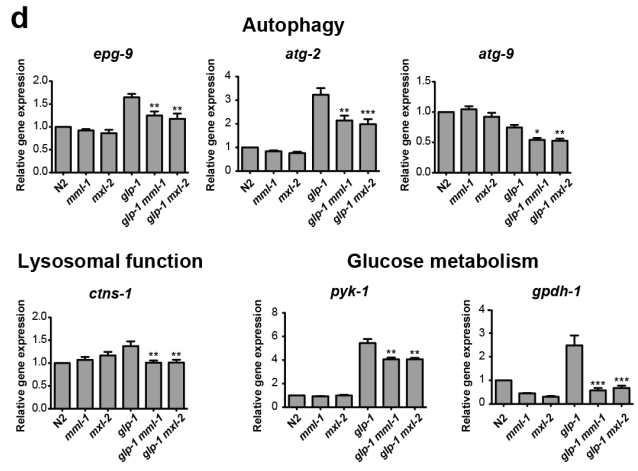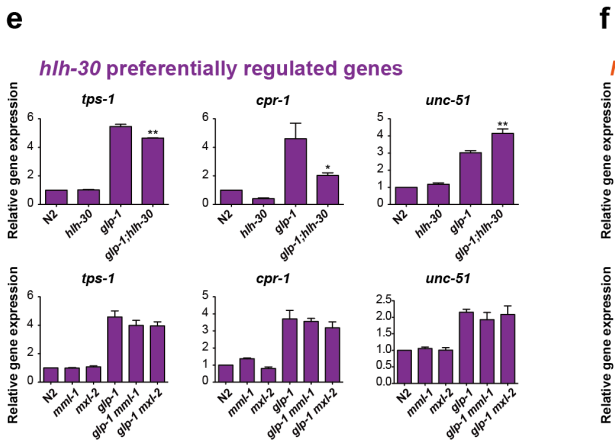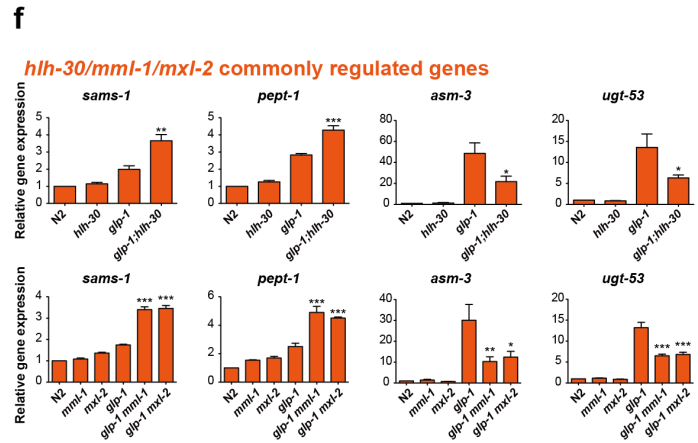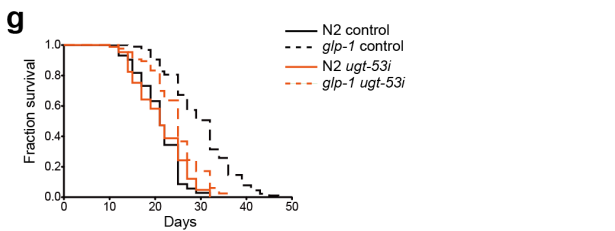

**Supplementary Figure 6: Transcriptome Analysis of *hlh-30* and *mml-1/mxl-2* Reveals Distinct and Overlapping Target Genes.** (a) Hierarchical clustering analysis of RNA-seq samples based on the log fold changes of expression counts. (b) The Venn diagram shows the comparison of DEG between *mml-1* vs N2 and *mxl-2* vs N2. (c) GO enrichment analysis for DEG of *glp-1mxl-2* vs *glp-1*. (d) qRT-PCR analysis of autophagy genes (*epg-9*, *atg-2* and *atg-9*), lysosomal genes (*ctns-1*) and glucose metabolism genes (*pyk-1* and *gpdh-1*) The bars represent mean  $\pm$  s.e.m. from three biological replicates. (e and f) qRT-PCR analysis of *hlh-30* preferentially regulated genes such as *tps-1*, *cpr-1* and *unc-51* and *hlh-30/mml-1/mxl-2* commonly regulated genes including *sams-1*, *pept-1*, *asm-3* and *ugt-53*. The bars represent mean  $\pm$  s.e.m. from three biological replicates. (g) *hlh-30* and *mml-1/mxl-2* commonly regulated genes, *ugt-53* knockdown abolish *glp-1* longevity but do not affect N2 lifespan. See Supplementary Table 1 for details and repeats. (d-f) P value (\* P< 0.05, \*\* P< 0.01 and \*\*\* P< 0.001) was determined by one-way ANOVA with Tukey's test relative to *glp-1*.

**a**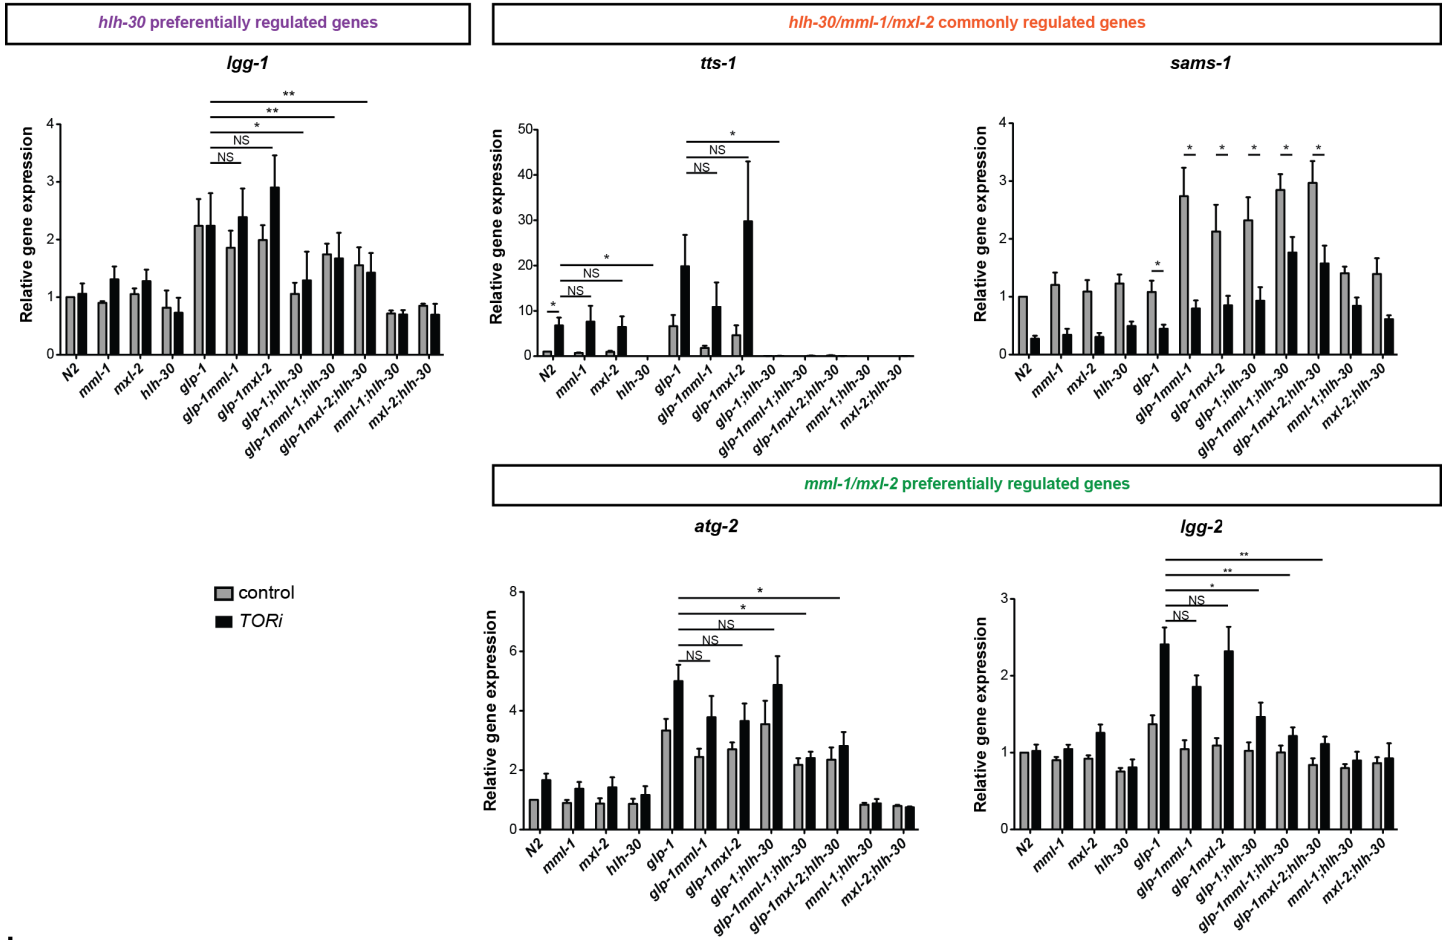**b**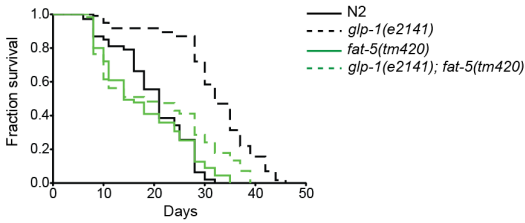**c**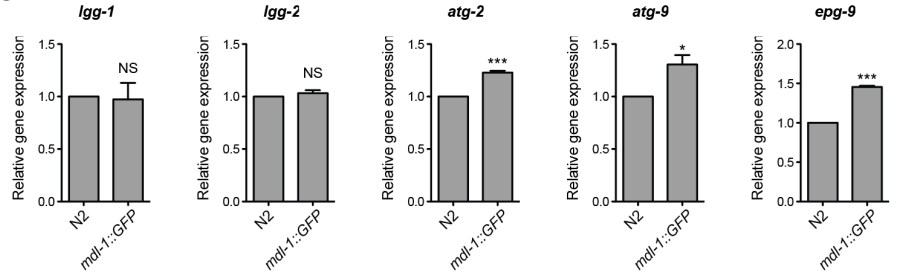**d**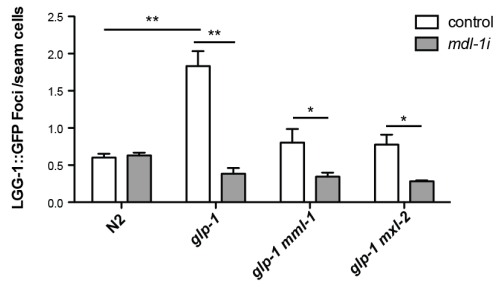**e**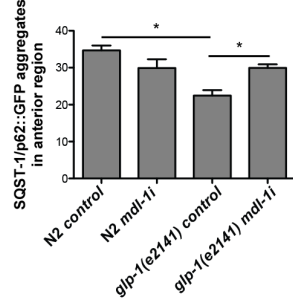**f**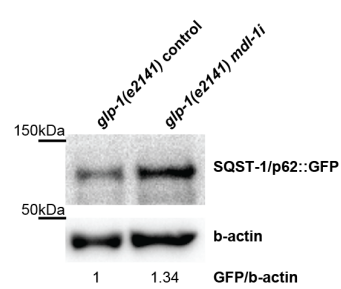**g**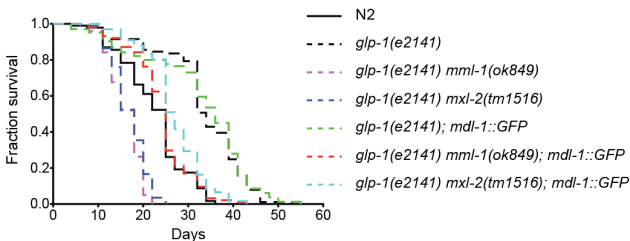**h**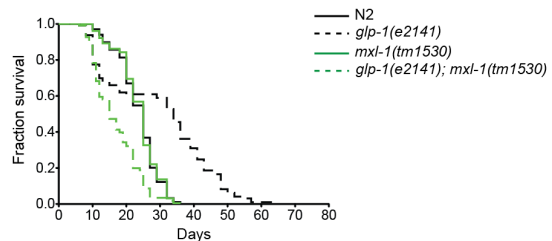

**Supplementary Figure 7: HLH transcription factors mediate TOR signaling outputs to various extents.**

(a) qRT-PCR analysis of *lgg-1*, *tts-1*, *sams-1*, *atg-2* and *lgg-2* after treatment with control or TOR RNAi in indicated genotypes. The bars indicate mean  $\pm$  s.e.m. relative to N2 fed with control RNAi from three biological replicates. P value (\* P< 0.05 and \*\* P< 0.01) was determined by one-way ANOVA with Tukey's test. (b) *fat-5 (tm420)* deletion suppresses *glp-1* longevity. (c) qRT-PCR analysis of autophagy genes in N2 and *mdl-1* overexpression strains. *mdl-1* overexpression induces the expression of some of the autophagy genes. The bar represents mean  $\pm$  s.e.m. from three experiments. P value (\*P< 0.05, \*\*\*P<0.001) was determined by *t*-test. (d) Quantification of LGG-1::GFP puncta in seam cells. The bar represents mean  $\pm$  s.e.m. from three biological replicates (>20 worms each). P value (\*P< 0.05, \*\*P< 0.01) was determined by *t*-test. *mdl-1* RNAi decreases the numbers of LGG-1 foci in *glp-1* background. In addition, *mdl-1* RNAi further decreases the numbers of LGG-1 foci in *glp-1mml-1* and *glp-1mxl-2*. (e) Quantification of SQST-1/p62::GFP foci in the pharyngeal region. The bar represents mean  $\pm$  s.e.m. from three experiments (>20 worms each). P value (\*P< 0.05) relative to N2 control or *glp-1* control was determined by *t*-test. *mdl-1* RNAi knockdown increases SQST-1/p62::GFP foci. (f) Representative Western Blot showing SQST-1::GFP and loading control, b-actin. *mdl-1* RNAi knockdown increases the relative SQST-1/p62::GFP level normalized to b-actin in *glp-1* background in 3 different biological repeats. (g) MDL-1::GFP transgene partially rescues the shortevity of *glp-1mml-1* and *glp-1mxl-2*. (h) *mxl-1* is required for *glp-1* longevity. See Supplementary Table 1 for details and repeats (b, g and h).

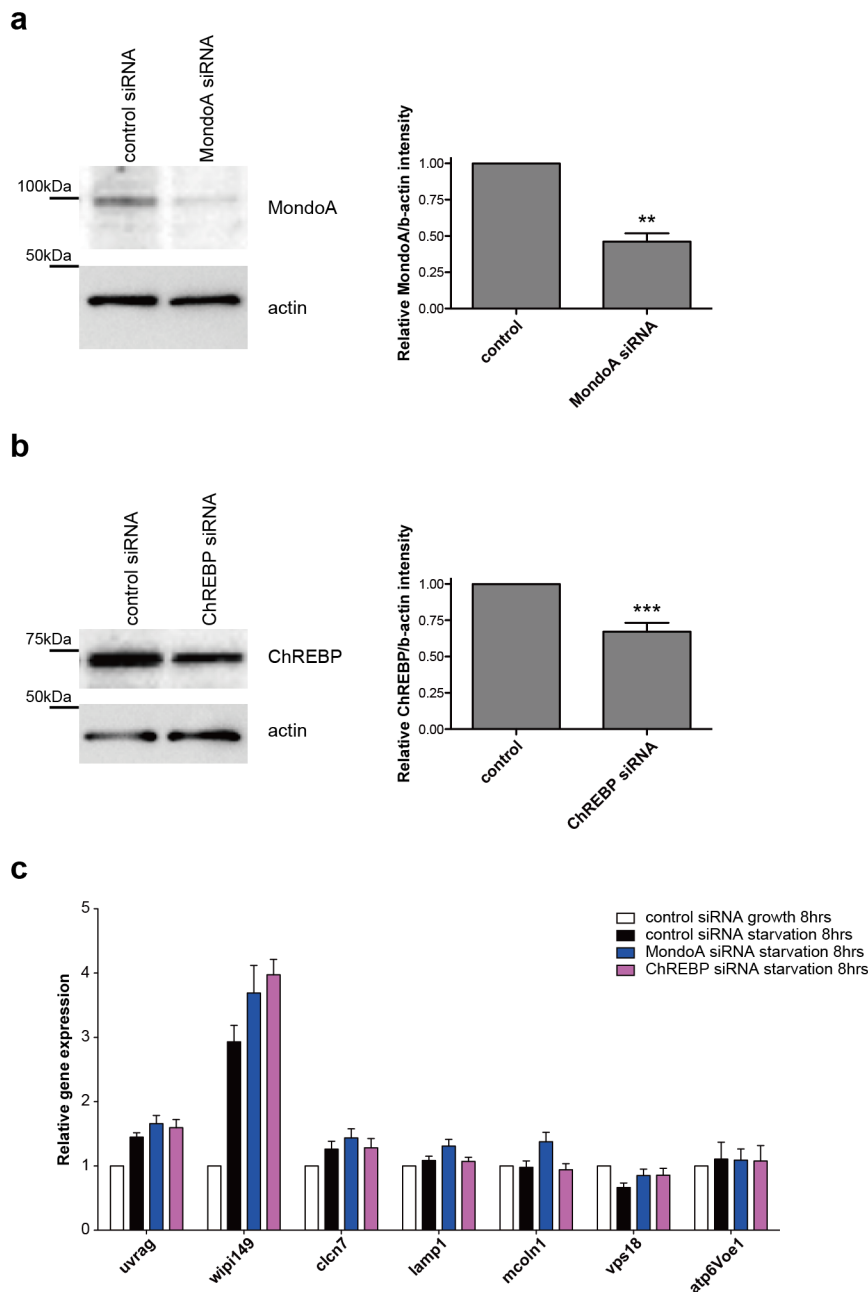

**Supplementary Figure 8: MondoA and ChREBP Knockdown Affect a Subset of TFEB Target Genes.**

(a and b) A representative Western Blot and bar graphs showing that MondoA or ChREBP siRNA diminish MondoA (a) or ChREBP (b) protein levels, respectively. The bars indicate mean  $\pm$  s.e.m. relative to control from three biological replicates. P value (\*\*  $P < 0.01$  and \*\*\*  $P < 0.001$ ) was determined by *t*-test. (c) qRT-PCR analysis of TFEB target genes. These genes are not significantly changed upon MondoA or ChREBP siRNA compared to control siRNA starvation condition. The bar represents mean  $\pm$  s.e.m. from 5 experiments relative to control siRNA 8 hours growth condition.

**Fig. 4e**

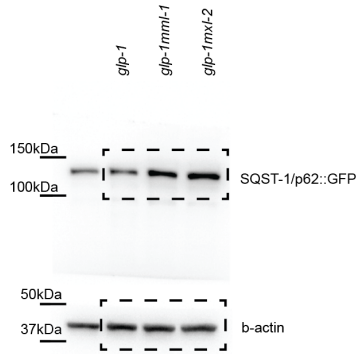

**Supplementary fig. 4c**

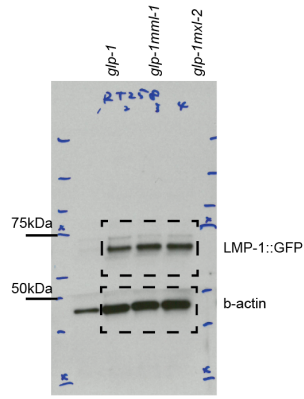

**Supplementary fig. 4h**

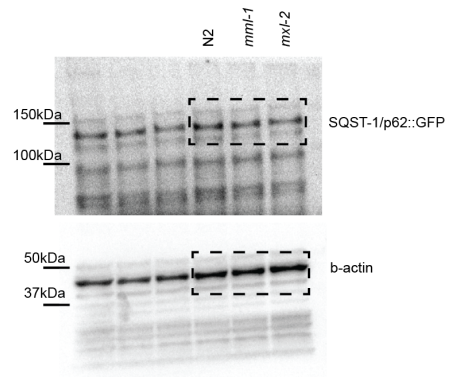

**Fig. 5a**

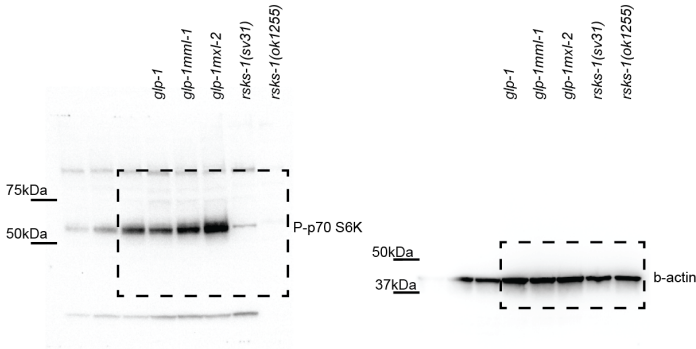

**Fig. 5h**

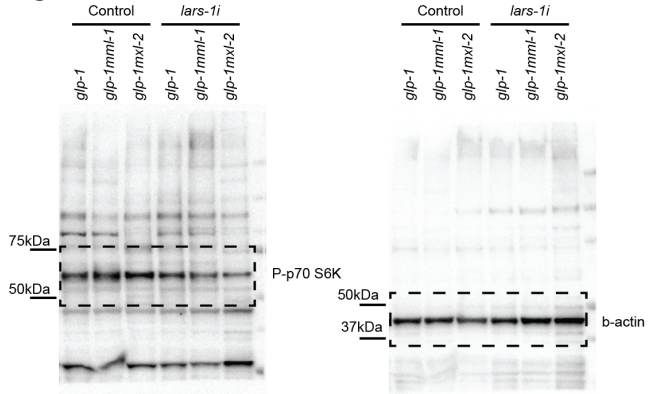

**Supplementary fig. 5a**

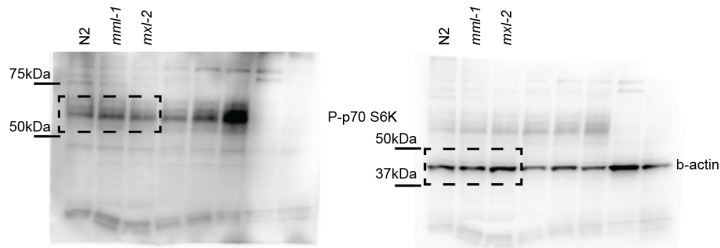

**Supplementary fig. 5d**

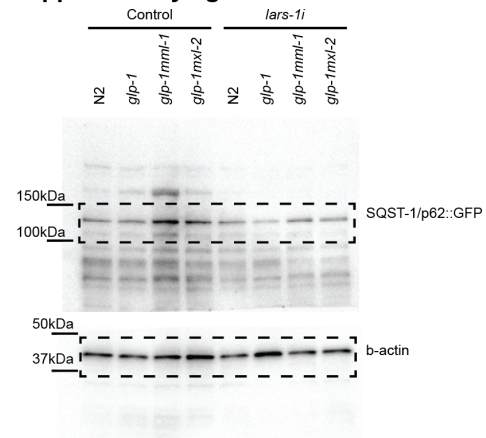

**Supplementary fig. 7f**

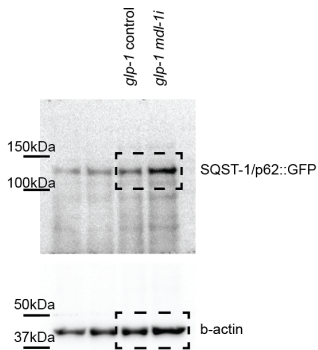

**Fig. 8e**

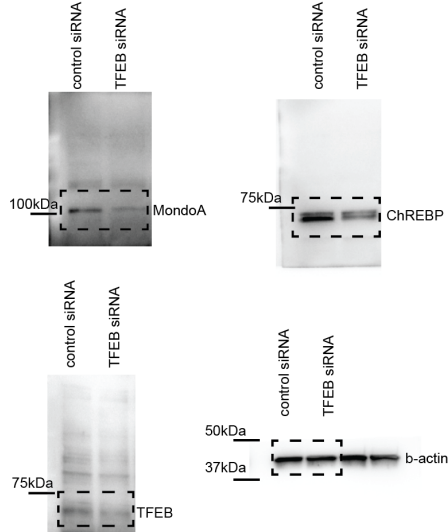

**Supplementary fig. 8a**

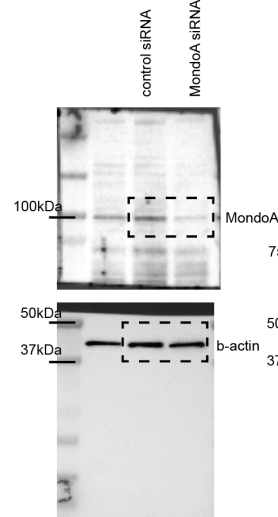

**Supplementary fig. 8b**

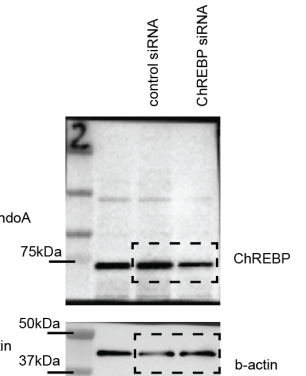

**Supplementary Table 1: Lifespan data.**

| Strains                                                                                    | Treatment<br>/RNAi | Media<br>n<br>LS | Median<br>diff.<br>from<br>cntl. | *<br>Animals | Max<br>LS | Max diff.<br>from cntl. | P value | Ref.<br>Cntl.                     |
|--------------------------------------------------------------------------------------------|--------------------|------------------|----------------------------------|--------------|-----------|-------------------------|---------|-----------------------------------|
| <b><i>glp-1</i> lifespan</b>                                                               |                    |                  |                                  |              |           |                         |         |                                   |
| Both <i>mml-1</i> and <i>mxl-2</i> are required for <i>glp-1</i> longevity.                |                    |                  |                                  |              |           |                         |         |                                   |
| N2                                                                                         |                    | 29               |                                  | 65/120       | 36        |                         |         |                                   |
| <i>mml-1</i> ( <i>ok849</i> )                                                              |                    | 26               | -10.34%                          | 70/120       | 36        | 0.00%                   | 0.0109  | vs. N2                            |
| <i>mxl-2</i> ( <i>tm1516</i> )                                                             |                    | 17               | -41.38%                          | 88/120       | 31        | -13.89%                 | <0.0001 | vs. N2                            |
| <i>glp-1</i> ( <i>e2141</i> )                                                              |                    | 43               | 48.28                            | 101/120      | 58        | 61.11%                  | <0.0001 | vs. N2                            |
| <i>glp-1</i> ( <i>e2141</i> ) <i>mml-1</i> ( <i>ok849</i> )                                |                    | 15               | -65.12%                          | 99/120       | 24        | -58.62%                 | <0.0001 | vs. <i>glp-1</i> ( <i>e2141</i> ) |
| <i>glp-1</i> ( <i>e2141</i> ) <i>mxl-2</i> ( <i>tm1516</i> )                               |                    | 12               | -72.09%                          | 101/120      | 26        | -55.17%                 | <0.0001 | vs. <i>glp-1</i> ( <i>e2141</i> ) |
| <hr/>                                                                                      |                    |                  |                                  |              |           |                         |         |                                   |
| N2                                                                                         |                    | 29               |                                  | 74/122       | 41        |                         |         |                                   |
| <i>mml-1</i> ( <i>ok849</i> )                                                              |                    | 25               | -13.79%                          | 75/120       | 39        | -13.79%                 | 0.0073  | vs. N2                            |
| <i>mxl-2</i> ( <i>tm1516</i> )                                                             |                    | 18               | -37.93%                          | 107/120      | 32        | -37.93%                 | <0.0001 | vs. N2                            |
| <i>glp-1</i> ( <i>e2141</i> )                                                              |                    | 39               | 34.48%                           | 87/120       | 52        | 34.48%                  | <0.0001 | vs. N2                            |
| <i>glp-1</i> ( <i>e2141</i> ) <i>mml-1</i> ( <i>ok849</i> )                                |                    | 14               | -64.10%                          | 100/120      | 27        | -48.08%                 | <0.0001 | vs. <i>glp-1</i> ( <i>e2141</i> ) |
| <i>glp-1</i> ( <i>e2141</i> ) <i>mxl-2</i> ( <i>tm1516</i> )                               |                    | 15               | -61.54%                          | 89/121       | 39        | -25.00%                 | <0.0001 | vs. <i>glp-1</i> ( <i>e2141</i> ) |
| <hr/>                                                                                      |                    |                  |                                  |              |           |                         |         |                                   |
| N2                                                                                         |                    | 26               |                                  | 81/120       | 38        |                         |         |                                   |
| <i>mml-1</i> ( <i>ok849</i> )                                                              |                    | 24               | -7.69%                           | 75/120       | 38        | 0.00%                   | 0.0048  | vs. N2                            |
| <i>mxl-2</i> ( <i>tm1516</i> )                                                             |                    | 19               | -26.92%                          | 101/120      | 40        | 5.26%                   | <0.0001 | vs. N2                            |
| <i>glp-1</i> ( <i>e2141</i> )                                                              |                    | 36               | 38.46%                           | 96/120       | 56        | 47.37%                  | <0.0001 | vs. N2                            |
| <i>glp-1</i> ( <i>e2141</i> ) <i>mml-1</i> ( <i>ok849</i> )                                |                    | 17               | -52.78%                          | 105/120      | 33        | -41.07%                 | <0.0001 | vs. <i>glp-1</i> ( <i>e2141</i> ) |
| <i>glp-1</i> ( <i>e2141</i> ) <i>mxl-2</i> ( <i>tm1516</i> )                               |                    | 15               | -58.33%                          | 101/120      | 26        | -53.57%                 | <0.0001 | vs. <i>glp-1</i> ( <i>e2141</i> ) |
| <hr/>                                                                                      |                    |                  |                                  |              |           |                         |         |                                   |
| <b>Germline ablation lifespan</b>                                                          |                    |                  |                                  |              |           |                         |         |                                   |
| Both <i>mml-1</i> and <i>mxl-2</i> are required for longevity conferred by Z1/Z2 ablation. |                    |                  |                                  |              |           |                         |         |                                   |
| N2                                                                                         | mock               | 22               |                                  | 84/135       | 32        |                         |         |                                   |
| <i>mml-1</i> ( <i>ok849</i> )                                                              | mock               | 22               | 0.00%                            | 114/135      | 39        | 21.88%                  | NS      | vs. N2 (mock)                     |
| <i>mxl-2</i> ( <i>tm1516</i> )                                                             | mock               | 15               | -31.82%                          | 104/135      | 34        | 6.25%                   | 0.0001  | vs. N2 (mock)                     |
| N2                                                                                         | Z1/Z2 ablated      | 39               | 77.27%                           | 51/88        | 67        | 109.38%                 | <0.0001 | vs. N2 (mock)                     |
| <i>mml-1</i> ( <i>ok849</i> )                                                              | Z1/Z2 ablated      | 18               | -53.85%                          | 22/74        | 25        | -62.69%                 | <0.0001 | vs. N2 (Z1/Z2 ablated)            |
| <i>mxl-2</i> ( <i>tm1516</i> )                                                             | Z1/Z2 ablated      | 18               | -53.85%                          | 69/115       | 25        | -62.69%                 | <0.0001 | vs. N2 (Z1/Z2 ablated)            |
| <hr/>                                                                                      |                    |                  |                                  |              |           |                         |         |                                   |
| N2                                                                                         | mock               | 25               |                                  | 85/120       | 35        |                         |         |                                   |
| <i>mml-1</i> ( <i>ok849</i> )                                                              | mock               | 25               | 0.00%                            | 104/120      | 35        | 0.00%                   | 0.0031  | vs. N2 (mock)                     |
| <i>mxl-2</i> ( <i>tm1516</i> )                                                             | mock               | 20               | -20.00%                          | 91/120       | 35        | 0.00%                   | 0.0533  | vs. N2 (mock)                     |
| N2                                                                                         | Z1/Z2 ablated      | 35               | 40.00%                           | 50/64        | 59        | 68.57%                  | <0.0001 | vs. N2 (mock)                     |
| <i>mml-1</i> ( <i>ok849</i> )                                                              | Z1/Z2 ablated      | 22               | -37.14%                          | 27/68        | 27        | -54.24%                 | <0.0001 | vs. N2 (Z1/Z2 ablated)            |
| <i>mxl-2</i> ( <i>tm1516</i> )                                                             | Z1/Z2 ablated      | 14               | -60.00%                          | 76/92        | 22        | -62.71%                 | <0.0001 | vs. N2 (Z1/Z2 ablated)            |



|                       |               |    |         |        |    |         |         |                        |  |
|-----------------------|---------------|----|---------|--------|----|---------|---------|------------------------|--|
| N2                    | mock          | 22 |         | 64/120 | 33 |         |         |                        |  |
| <i>mml-1 (ok849)</i>  | mock          | 19 | -13.64% | 90/120 | 30 | -9.09%  | 0.0249  | vs. N2 (mock)          |  |
| <i>mxl-2 (tm1516)</i> | mock          | 16 | -27.27% | 74/120 | 33 | 0.00%   | 0.0029  | vs. N2 (mock)          |  |
| N2                    | Z1/Z2 ablated | 38 | 72.73%  | 71/100 | 61 | 84.85%  | <0.0001 | vs. N2 (mock)          |  |
| <i>mml-1 (ok849)</i>  | Z1/Z2 ablated | 16 | -57.89% | 65/89  | 28 | -54.10% | <0.0001 | vs. N2 (Z1/Z2 ablated) |  |
| <i>mxl-2 (tm1516)</i> | Z1/Z2 ablated | 14 | -63.16% | 94/99  | 24 | -60.66% | <0.0001 | vs. N2 (Z1/Z2 ablated) |  |

#### *daf-2* and *cco-1* RNAi lifespan

Both *mml-1* and *mxl-2* are required for *daf-2* longevity.

*mml-1* is not required for *cco-1* lifespan.

|                       |              |    |         |         |    |         |         |                         |
|-----------------------|--------------|----|---------|---------|----|---------|---------|-------------------------|
| N2                    | L4440::Luc   | 25 |         | 62/120  | 35 |         |         |                         |
| <i>mml-1 (ok849)</i>  | L4440::Luc   | 18 | -28.00% | 98/120  | 29 | -17.14% | <0.0001 | vs. N2 (L4440::Luc)     |
| <i>mxl-2 (tm1516)</i> | L4440::Luc   | 18 | -28.00% | 105/123 | 29 | -17.14% | <0.0001 | vs. N2 (L4440::Luc)     |
| N2                    | <i>daf-2</i> | 54 | 116.00% | 73/120  | 71 | 102.86% | <0.0001 | vs. N2 (L4440::Luc)     |
| <i>mml-1 (ok849)</i>  | <i>daf-2</i> | 25 | -50.70% | 83/120  | 35 | -50.70% | <0.0001 | vs. N2 ( <i>daf-2</i> ) |
| <i>mxl-2 (tm1516)</i> | <i>daf-2</i> | 29 | -45.07% | 103/120 | 39 | -45.07% | <0.0001 | vs. N2 ( <i>daf-2</i> ) |
| N2                    | <i>cco-1</i> | 32 | 28.00%  | 88/120  | 50 | 42.86%  | <0.0001 | vs. N2 (L4440::Luc)     |
| <i>mml-1 (ok849)</i>  | <i>cco-1</i> | 32 | 0.00%   | 80/120  | 53 | 6.00%   | NS      | vs. N2 ( <i>cco-1</i> ) |
| <i>mxl-2 (tm1516)</i> | <i>cco-1</i> | 35 | 9.38%   | 74/120  | 64 | 28.00%  | 0.0029  | vs. N2 ( <i>cco-1</i> ) |

|                       |              |    |         |         |    |         |         |                         |
|-----------------------|--------------|----|---------|---------|----|---------|---------|-------------------------|
| N2                    | L4440::Luc   | 22 |         | 66/120  | 36 |         |         |                         |
| <i>mml-1 (ok849)</i>  | L4440::Luc   | 17 | -22.73% | 101/120 | 29 | -19.44% | <0.0001 | vs. N2 (L4440::Luc)     |
| <i>mxl-2 (tm1516)</i> | L4440::Luc   | 17 | -22.73% | 99/120  | 26 | -27.78% | <0.0001 | vs. N2 (L4440::Luc)     |
| N2                    | <i>daf-2</i> | 51 | 131.82% | 45/119  | 66 | 83.33%  | <0.0001 | vs. N2 (L4440::Luc)     |
| <i>mml-1 (ok849)</i>  | <i>daf-2</i> | 24 | -52.94% | 67/120  | 39 | -40.91% | <0.0001 | vs. N2 ( <i>daf-2</i> ) |
| <i>mxl-2 (tm1516)</i> | <i>daf-2</i> | 26 | -49.02% | 85/120  | 39 | -40.91% | <0.0001 | vs. N2 ( <i>daf-2</i> ) |
| N2                    | <i>cco-1</i> | 29 | 31.82%  | 83/125  | 53 | 47.22%  | <0.0001 | vs. N2 (L4440::Luc)     |
| <i>mml-1 (ok849)</i>  | <i>cco-1</i> | 32 | 10.34%  | 84/120  | 55 | 3.77%   | NS      | vs. N2 ( <i>cco-1</i> ) |
| <i>mxl-2 (tm1516)</i> | <i>cco-1</i> | 24 | -17.24% | 94/120  | 36 | -32.08% | <0.0001 | vs. N2 ( <i>cco-1</i> ) |

|                       |              |    |         |        |    |         |         |                         |
|-----------------------|--------------|----|---------|--------|----|---------|---------|-------------------------|
| N2                    | L4440::Luc   | 16 |         | 66/120 | 26 |         |         |                         |
| <i>mml-1 (ok849)</i>  | L4440::Luc   | 14 | -12.50% | 60/120 | 19 | -26.92% | <0.0001 | vs. N2 (L4440::Luc)     |
| <i>mxl-2 (tm1516)</i> | L4440::Luc   | 16 | 0.00%   | 94/120 | 19 | -26.92% | 0.0013  | vs. N2 (L4440::Luc)     |
| N2                    | <i>cco-1</i> | 33 | 106.25% | 82/120 | 47 | 80.77%  | <0.0001 | vs. N2 (L4440::Luc)     |
| <i>mml-1 (ok849)</i>  | <i>cco-1</i> | 29 | -12.12% | 89/120 | 43 | -8.51%  | NS      | vs. N2 ( <i>cco-1</i> ) |
| <i>mxl-2 (tm1516)</i> | <i>cco-1</i> | 22 | -33.33% | 94/120 | 38 | -19.15% | <0.0001 | vs. N2 ( <i>cco-1</i> ) |

**isp-1 lifespan***mml-1* is required for *isp-1* longevity (2 out of 3).

|                                     |    |         |        |    |         |         |                         |
|-------------------------------------|----|---------|--------|----|---------|---------|-------------------------|
| N2                                  | 26 |         | 97/120 | 35 |         |         |                         |
| <i>mml-1 (ok849)</i>                | 29 | 11.54%  | 92/120 | 37 | 5.71%   | NS      | vs. N2                  |
| <i>mxl-2 (tm1516)</i>               | 15 | -42.31% | 99/120 | 29 | -17.14% | <0.0001 | vs. N2                  |
| <i>isp-1(qm150)</i>                 | 42 | 61.54%  | 44/120 | 64 | 82.86%  | <0.0001 | vs. N2                  |
| <i>isp-1(qm150); mml-1 (ok849)</i>  | 26 | -38.10% | 63/120 | 59 | -7.81%  | <0.0001 | vs. <i>isp-1(qm150)</i> |
| <i>isp-1(qm150); mxl-2 (tm1516)</i> | 22 | -47.62% | 60/120 | 47 | -26.56% | <0.0001 | vs. <i>isp-1(qm150)</i> |
| N2                                  | 22 |         | 53/120 | 31 |         |         |                         |
| <i>mml-1 (ok849)</i>                | 22 | 0.00%   | 64/120 | 31 | 0.00%   | NS      | vs. N2                  |
| <i>mxl-2 (tm1516)</i>               | 22 | 0.00%   | 58/120 | 34 | 9.68%   | 0.0263  | vs. N2                  |
| <i>isp-1(qm150)</i>                 | 24 | 9.09%   | 22/120 | 56 | 80.65%  | 0.0176  | vs. N2                  |
| <i>isp-1(qm150); mml-1 (ok849)</i>  | 27 | 12.50%  | 36/120 | 52 | -7.14%  | NS      | vs. <i>isp-1(qm150)</i> |
| <i>isp-1(qm150); mxl-2 (tm1516)</i> | 22 | -8.33%  | 44/120 | 48 | -14.29% | 0.0183  | vs. <i>isp-1(qm150)</i> |
| N2                                  | 23 |         | 44/120 | 35 |         |         |                         |
| <i>mml-1 (ok849)</i>                | 21 | -8.70%  | 75/120 | 28 | -20.00% | 0.0003  | vs. N2                  |
| <i>mxl-2 (tm1516)</i>               | 21 | -8.70%  | 54/120 | 35 | 0.00%   | NS      | vs. N2                  |
| <i>isp-1(qm150)</i>                 | 40 | 73.91%  | 29/120 | 58 | 65.71%  | <0.0001 | vs. N2                  |
| <i>isp-1(qm150); mml-1 (ok849)</i>  | 26 | -35.00% | 37/120 | 58 | 0.00%   | 0.0326  | vs. <i>isp-1(qm150)</i> |
| <i>isp-1(qm150); mxl-2 (tm1516)</i> | 21 | -47.50% | 49/120 | 42 | -27.59% | <0.0001 | vs. <i>isp-1(qm150)</i> |

***mml-1* overexpression lifespan***mml-1* overexpression modestly extends N2 lifespan (2 out of 3).

|                                                               |    |         |         |    |        |        |        |
|---------------------------------------------------------------|----|---------|---------|----|--------|--------|--------|
| N2                                                            | 22 |         | 84/120  | 33 |        |        |        |
| <i>wgIs198 [mml-1::TY1::EGFP::3xFLAG(92C12) + unc-119(+)]</i> | 29 | 31.82%  | 36/120  | 40 | 21.21% | 0.0299 | vs. N2 |
| N2                                                            | 22 |         | 87/120  | 36 |        |        |        |
| <i>wgIs198 [mml-1::TY1::EGFP::3xFLAG(92C12) + unc-119(+)]</i> | 17 | -22.73% | 57/120  | 36 | 0.00%  | NS     | vs. N2 |
| N2                                                            | 22 |         | 90/140  | 36 |        |        |        |
| <i>wgIs198 [mml-1::TY1::EGFP::3xFLAG(92C12) + unc-119(+)]</i> | 25 | 13.64%  | 110/140 | 43 | 19.44% | 0.0010 | vs. N2 |

***mml-1* overexpression lifespan***mml-1* overexpression modestly extends N2 lifespan (1 out of 3).

|                                                      |    |         |        |    |        |    |        |
|------------------------------------------------------|----|---------|--------|----|--------|----|--------|
| N2                                                   | 22 |         | 84/120 | 36 |        |    |        |
| <i>dhEx966 (mml-1p::mml-1::GFP, myo-2p::mCherry)</i> | 19 | -13.64% | 90/120 | 33 | -8.33% | NS | vs. N2 |

|                                                                             |    |         |         |    |         |         |                  |
|-----------------------------------------------------------------------------|----|---------|---------|----|---------|---------|------------------|
| <i>dhEx967(mml-1p::mml-1::GFP, myo-2p::mCherry)</i>                         | 22 | 0.00%   | 87/120  | 29 | -19.44% | NS      | vs. N2           |
| N2                                                                          | 20 |         | 87/120  | 27 |         |         |                  |
| <i>dhEx966 (mml-1p::mml-1::GFP, myo-2p::mCherry)</i>                        | 22 | 10.00%  | 98/120  | 31 | 14.81%  | <0.0001 | vs. N2           |
| <i>dhEx967(mml-1p::mml-1::GFP, myo-2p::mCherry)</i>                         | 25 | 25.00%  | 91/120  | 36 | 33.33%  | <0.0001 | vs. N2           |
| N2                                                                          | 22 |         | 84/120  | 33 |         |         |                  |
| <i>dhEx966 (mml-1p::mml-1::GFP, myo-2p::mCherry)</i>                        | 22 | 0.00%   | 76/120  | 33 | 0.00%   | NS      | vs. N2           |
| <i>dhEx967(mml-1p::mml-1::GFP, myo-2p::mCherry)</i>                         | 22 | 0.00%   | 78/120  | 33 | 0.00%   | NS      | vs. N2           |
| <b><i>mml-1</i> overexpression lifespan in <i>glp-1</i> background</b>      |    |         |         |    |         |         |                  |
| <i>mml-1</i> overexpression did not further extend <i>glp-1</i> longevity.  |    |         |         |    |         |         |                  |
| N2                                                                          | 26 |         | 93/120  | 37 |         |         |                  |
| <i>glp-1 (e2141)</i>                                                        | 37 | 42.31%  | 76/125  | 52 | 40.54%  | <0.0001 | vs. N2           |
| <i>glp-1 (e2141);wgIs198 [mml-1::TY1::EGFP::3xFLAG(92C12) + unc-119(+)]</i> | 40 | 8.11%   | 53/71   | 58 | 11.54%  | NS      | vs. <i>glp-1</i> |
| N2                                                                          | 24 |         | 104/120 | 40 |         |         |                  |
| <i>glp-1 (e2141)</i>                                                        | 37 | 54.17%  | 105/120 | 54 | 35.00%  | <0.0001 | vs. N2           |
| <i>glp-1 (e2141);wgIs198 [mml-1::TY1::EGFP::3xFLAG(92C12) + unc-119(+)]</i> | 33 | -10.81% | 85/120  | 50 | -7.41%  | NS      | vs. <i>glp-1</i> |
| N2                                                                          | 22 |         | 113/120 | 38 |         |         |                  |
| <i>glp-1 (e2141)</i>                                                        | 35 | 59.09%  | 104/120 | 52 | 36.84%  | <0.0001 | vs. N2           |
| <i>glp-1 (e2141);wgIs198 [mml-1::TY1::EGFP::3xFLAG(92C12) + unc-119(+)]</i> | 31 | -11.43% | 99/120  | 59 | 13.46%  | 0.0984  | vs. <i>glp-1</i> |
| <b><i>mml-1</i> rescue lifespan</b>                                         |    |         |         |    |         |         |                  |
| <i>mml-1</i> overexpression rescues the shortevity of <i>glp-1 mml-1</i> .  |    |         |         |    |         |         |                  |
| N2                                                                          | 21 |         | 56/120  | 31 |         |         |                  |
| <i>glp-1 (e2141)</i>                                                        | 35 | 66.67%  | 75/120  | 51 | 64.52%  | <0.0001 | vs. N2           |
| <i>glp-1 (e2141) mml-1 (ok849)</i>                                          | 19 | -45.71% | 97/120  | 26 | -49.02% | <0.0001 | vs. <i>glp-1</i> |

|                                                                                           |    |         |         |    |         |         |                  |
|-------------------------------------------------------------------------------------------|----|---------|---------|----|---------|---------|------------------|
| <i>glp-1 (e2141) mml-1 (ok849);wgIs198 [mml-1::TY1::EGFP::3xFLAG(92C12) + unc-119(+)]</i> | 35 | 0.00%   | 68/120  | 51 | 0.00%   | NS      | vs. <i>glp-1</i> |
| <hr/>                                                                                     |    |         |         |    |         |         |                  |
| N2                                                                                        | 25 |         | 47/120  | 36 |         |         |                  |
| <i>glp-1 (e2141)</i>                                                                      | 39 | 56.00%  | 61/120  | 55 | 52.78%  | <0.0001 | vs. N2           |
| <i>glp-1 (e2141) mml-1 (ok849)</i>                                                        | 18 | -53.85% | 61/120  | 25 | -54.55% | <0.0001 | vs. <i>glp-1</i> |
| <hr/>                                                                                     |    |         |         |    |         |         |                  |
| <i>glp-1 (e2141) mml-1 (ok849);wgIs198 [mml-1::TY1::EGFP::3xFLAG(92C12) + unc-119(+)]</i> | 32 | -17.95% | 95/120  | 55 | 0.00%   | 0.03891 | vs. <i>glp-1</i> |
| <hr/>                                                                                     |    |         |         |    |         |         |                  |
| N2                                                                                        | 30 |         | 93/150  | 42 |         |         |                  |
| <i>glp-1 (e2141)</i>                                                                      | 39 | 30.00%  | 87/150  | 70 | 66.67%  | <0.0001 | vs. N2           |
| <i>glp-1 (e2141) mml-1 (ok849)</i>                                                        | 18 | -53.85% | 56/150  | 24 | -65.71% | <0.0001 | vs. <i>glp-1</i> |
| <hr/>                                                                                     |    |         |         |    |         |         |                  |
| <i>glp-1 (e2141) mml-1 (ok849);wgIs198 [mml-1::TY1::EGFP::3xFLAG(92C12) + unc-119(+)]</i> | 30 | -23.08% | 104/150 | 68 | -2.86%  | 0,00575 | vs. <i>glp-1</i> |
| <hr/>                                                                                     |    |         |         |    |         |         |                  |
| <b><i>mml-1</i> rescue lifespan</b>                                                       |    |         |         |    |         |         |                  |
| <i>mml-1</i> overexpression rescues the shortevity of <i>glp-1 mml-1</i> .                |    |         |         |    |         |         |                  |
| <hr/>                                                                                     |    |         |         |    |         |         |                  |
| N2                                                                                        | 24 |         | 88/120  | 35 |         |         |                  |
| <i>glp-1 (e2141)</i>                                                                      | 31 | 29.17%  | 105/120 | 45 | 28.57%  | <0.0001 | vs. N2           |
| <i>glp-1 (e2141) mml-1 (ok849)</i>                                                        | 19 | -38.71% | 88/120  | 26 | -42.22% | <0.0001 | vs. <i>glp-1</i> |
| <hr/>                                                                                     |    |         |         |    |         |         |                  |
| <i>glp-1 (e2141) mml-1 (ok849); dhEx966 (mml-1p::mml-1::GFP, myo-2p::mCherry)</i>         | 26 | -16.13% | 89/120  | 41 | -8.89%  | 0.01782 | vs. <i>glp-1</i> |
| <hr/>                                                                                     |    |         |         |    |         |         |                  |
| <i>glp-1 (e2141) mml-1 (ok849); dhEx967(mml-1p::mml-1::GFP, myo-2p::mCherry)</i>          | 26 | -16.13% | 94/120  | 42 | -6.67%  | 0.01561 | vs. <i>glp-1</i> |
| <hr/>                                                                                     |    |         |         |    |         |         |                  |
| N2                                                                                        | 23 |         | 94/120  | 35 |         |         |                  |
| <i>glp-1 (e2141)</i>                                                                      | 32 | 39.13%  | 89/120  | 46 | 31.43%  | <0.0001 | vs. N2           |
| <i>glp-1 (e2141) mml-1 (ok849)</i>                                                        | 16 | -50.00% | 57/120  | 23 | -50.00% | <0.0001 | vs. <i>glp-1</i> |
| <hr/>                                                                                     |    |         |         |    |         |         |                  |
| <i>glp-1 (e2141) mml-1 (ok849); dhEx966 (mml-1p::mml-1::GFP, myo-2p::mCherry)</i>         | 27 | -15.63% | 70/120  | 40 | -13.04% | 0.0186  | vs. <i>glp-1</i> |
| <hr/>                                                                                     |    |         |         |    |         |         |                  |
| <i>glp-1 (e2141) mml-1 (ok849); dhEx967(mml-1p::mml-1::GFP, myo-2p::mCherry)</i>          | 27 | -15.63% | 80/120  | 44 | -4.35%  | 0.0106  | vs. <i>glp-1</i> |
| <hr/>                                                                                     |    |         |         |    |         |         |                  |

**TOR lifespan**

*mml-1* and *mxl-2* are required for TOR longevity.

|                                |            |    |         |         |    |         |         |                                        |
|--------------------------------|------------|----|---------|---------|----|---------|---------|----------------------------------------|
| N2                             | L4440::Luc | 23 |         | 72/120  | 32 |         |         |                                        |
| <i>mml-1</i> ( <i>ok849</i> )  | L4440::Luc | 17 | -26.09% | 60/120  | 28 | -12.50% | <0.0001 | vs. N2<br>(L4440::Luc)                 |
| <i>mxl-2</i> ( <i>tm1516</i> ) | L4440::Luc | 18 | -21.74% | 92/120  | 32 | 0.00%   | 0.0035  | (L4440::Luc)<br>vs. N2<br>(L4440::Luc) |
| N2                             | TOR        | 25 | 8.70%   | 52/120  | 35 | 9.38%   | <0.0001 | (L4440::Luc)<br>vs. N2<br>(L4440::Luc) |
| <i>mml-1</i> ( <i>ok849</i> )  | TOR        | 17 | -32.00% | 58/120  | 25 | -28.57% | <0.0001 | vs. N2<br>(TOR)                        |
| <i>mxl-2</i> ( <i>tm1516</i> ) | TOR        | 18 | -28.00% | 86/120  | 28 | -20.00% | <0.0001 | vs. N2<br>(TOR)                        |
| N2                             | L4440::Luc | 26 |         | 46/120  | 31 |         |         |                                        |
| <i>mml-1</i> ( <i>ok849</i> )  | L4440::Luc | 19 | -26.92% | 53/120  | 33 | 6.45%   | <0.0001 | vs. N2<br>(L4440::Luc)                 |
| <i>mxl-2</i> ( <i>tm1516</i> ) | L4440::Luc | 17 | -34.62% | 80/120  | 28 | -9.68%  | <0.0001 | vs. N2<br>(L4440::Luc)                 |
| N2                             | TOR        | 28 | 7.69%   | 48/120  | 41 | 32.26%  | 0.0003  | (L4440::Luc)<br>vs. N2<br>(L4440::Luc) |
| <i>mml-1</i> ( <i>ok849</i> )  | TOR        | 17 | -39.29% | 55/120  | 21 | -48.78% | <0.0001 | vs. N2<br>(TOR)                        |
| <i>mxl-2</i> ( <i>tm1516</i> ) | TOR        | 14 | -50.00% | 113/120 | 21 | -48.78% | <0.0001 | vs. N2<br>(TOR)                        |
| N2                             | L4440::Luc | 23 |         | 63/120  | 30 |         |         |                                        |
| <i>mml-1</i> ( <i>ok849</i> )  | L4440::Luc | 16 | -30.43% | 41/120  | 25 | -16.67% | <0.0001 | vs. N2<br>(L4440::Luc)                 |
| <i>mxl-2</i> ( <i>tm1516</i> ) | L4440::Luc | 18 | -21.74% | 80/120  | 25 | -16.67% | <0.0001 | vs. N2<br>(L4440::Luc)                 |
| N2                             | TOR        | 28 | 21.74%  | 43/120  | 35 | 16.67%  | 0.0007  | (L4440::Luc)<br>vs. N2<br>(L4440::Luc) |
| <i>mml-1</i> ( <i>ok849</i> )  | TOR        | 16 | -42.86% | 36/120  | 21 | -40.00% | <0.0001 | vs. N2<br>(TOR)                        |
| <i>mxl-2</i> ( <i>tm1516</i> ) | TOR        | 16 | -42.86% | 61/120  | 21 | -40.00% | <0.0001 | vs. N2<br>(TOR)                        |

**TOR lifespan**

TOR knockdown fails to rescue shortevity of *glp-1mml-1* and *glp-1mxl-2*.

|                                                              |            |    |         |         |    |         |         |                                        |
|--------------------------------------------------------------|------------|----|---------|---------|----|---------|---------|----------------------------------------|
| N2                                                           | L4440::Luc | 25 |         | 53/120  | 32 |         |         |                                        |
| <i>glp-1</i> ( <i>e2141</i> )                                | L4440::Luc | 30 | 20.00%  | 77/120  | 44 | 37.50%  | <0.0001 | vs. N2<br>(L4440::Luc)                 |
| <i>glp-1</i> ( <i>e2141</i> ) <i>mml-1</i> ( <i>ok849</i> )  | L4440::Luc | 15 | -50.00% | 58/120  | 21 | -52.27% | <0.0001 | vs. <i>glp-1</i><br>(L4440::Luc)       |
| <i>glp-1</i> ( <i>e2141</i> ) <i>mxl-2</i> ( <i>tm1516</i> ) | L4440::Luc | 15 | -50.00% | 108/120 | 23 | -47.73% | <0.0001 | vs. <i>glp-1</i><br>(L4440::Luc)       |
| N2                                                           | TOR        | 32 | 28.00%  | 53/120  | 44 | 37.50%  | <0.0001 | (L4440::Luc)<br>vs. N2<br>(L4440::Luc) |
| <i>glp-1</i> ( <i>e2141</i> )                                | TOR        | 28 | -6.67%  | 69/120  | 39 | -11.36% | 0.0032  | vs. <i>glp-1</i><br>(L4440::Luc)       |
| <i>glp-1</i> ( <i>e2141</i> ) <i>mml-1</i> ( <i>ok849</i> )  | TOR        | 17 | -39.29% | 43/120  | 21 | -46.15% | <0.0001 | vs. <i>glp-1</i><br>(TOR)              |
| <i>glp-1</i> ( <i>e2141</i> ) <i>mxl-2</i> ( <i>tm1516</i> ) | TOR        | 15 | -46.43% | 94/120  | 21 | -46.15% | <0.0001 | vs. <i>glp-1</i><br>(TOR)              |
| <i>glp-1</i> ( <i>e2141</i> )                                | L4440::Luc | 28 |         | 48/120  | 36 |         |         |                                        |
| <i>glp-1</i> ( <i>e2141</i> ) <i>mml-1</i> ( <i>ok849</i> )  | L4440::Luc | 19 | -32.14% | 53/120  | 21 | -41.67% | <0.0001 | vs. <i>glp-1</i><br>(L4440::Luc)       |

|                                     |            |    |         |         |    |         |         |                                  |
|-------------------------------------|------------|----|---------|---------|----|---------|---------|----------------------------------|
| <i>glp-1 (e2141) mxl-2 (tm1516)</i> | L4440::Luc | 14 | -50.00% | 112/120 | 23 | -36.11% | <0.0001 | vs. <i>glp-1</i><br>(L4440::Luc) |
| <i>glp-1 (e2141)</i>                | TOR        | 26 | -7.14%  | 50/120  | 36 | 0.00%   | NS      | vs. <i>glp-1</i><br>(L4440::Luc) |
| <i>glp-1 (e2141) mml-1 (ok849)</i>  | TOR        | 14 | -46.15% | 79/120  | 19 | -47.22% | <0.0001 | vs. <i>glp-1</i><br>(TOR)        |
| <i>glp-1 (e2141) mxl-2 (tm1516)</i> | TOR        | 14 | -46.15% | 102/120 | 19 | -47.22% | <0.0001 | vs. <i>glp-1</i><br>(TOR)        |

|                                     |            |    |         |        |    |         |         |                                  |
|-------------------------------------|------------|----|---------|--------|----|---------|---------|----------------------------------|
| <i>glp-1 (e2141)</i>                | L4440::Luc | 26 |         | 78/120 | 36 |         |         |                                  |
| <i>glp-1 (e2141) mml-1 (ok849)</i>  | L4440::Luc | 17 | -34.62% | 49/120 | 19 | -47.22% | <0.0001 | vs. <i>glp-1</i><br>(L4440::Luc) |
| <i>glp-1 (e2141) mxl-2 (tm1516)</i> | L4440::Luc | 15 | -42.31% | 93/120 | 17 | -52.78% | <0.0001 | vs. <i>glp-1</i><br>(L4440::Luc) |
| <i>glp-1 (e2141)</i>                | TOR        | 27 | 3.85%   | 67/120 | 36 | 0.00%   | 0.0585  | vs. <i>glp-1</i><br>(L4440::Luc) |
| <i>glp-1 (e2141) mml-1 (ok849)</i>  | TOR        | 17 | -37.04% | 35/120 | 19 | -47.22% | <0.0001 | vs. <i>glp-1</i><br>(TOR)        |
| <i>glp-1 (e2141) mxl-2 (tm1516)</i> | TOR        | 15 | -44.44% | 86/120 | 20 | -44.44% | <0.0001 | vs. <i>glp-1</i><br>(TOR)        |

### HLH-30 overexpression lifespan

HLH-30::GFP overexpression does not rescue the shortevity of *glp-1mml-1* and *glp-1mxl-2*.

|                                                                                  |  |    |         |         |    |         |         |                  |
|----------------------------------------------------------------------------------|--|----|---------|---------|----|---------|---------|------------------|
| N2                                                                               |  | 25 |         | 49/120  | 39 |         |         |                  |
| <i>glp-1 (e2141)</i>                                                             |  | 39 | 56.00%  | 83/120  | 53 | 35.90%  | <0.0001 | vs. N2           |
| <i>glp-1 (e2141) mml-1 (ok849)</i>                                               |  | 22 | -43.59% | 82/120  | 27 | -49.06% | <0.0001 | vs. <i>glp-1</i> |
| <i>glp-1 (e2141) mxl-2 (tm1516)</i>                                              |  | 20 | -48.72% | 96/120  | 27 | -49.06% | <0.0001 | vs. <i>glp-1</i> |
| <i>glp-1(e2141) mml-1(ok849);sqIs19[hlh-30p::hlh-30::GFP + rol-6(su1006)]</i>    |  | 18 | -53.85% | 104/120 | 27 | -49.06% | <0.0001 | vs. <i>glp-1</i> |
| <i>glp-1(e2141) mxl-2 (tm1516); sqIs19[hlh-30p::hlh-30::GFP + rol-6(su1006)]</i> |  | 18 | -53.85% | 106/120 | 32 | -39.62% | <0.0001 | vs. <i>glp-1</i> |

|                                                                                 |  |    |         |         |    |         |         |                  |
|---------------------------------------------------------------------------------|--|----|---------|---------|----|---------|---------|------------------|
| N2                                                                              |  | 25 |         | 91/125  | 38 |         |         |                  |
| <i>glp-1 (e2141)</i>                                                            |  | 34 | 36.00%  | 87/125  | 48 | 26.32%  | <0.0001 | vs. N2           |
| <i>glp-1 (e2141) mml-1 (ok849)</i>                                              |  | 16 | -52.94% | 76/125  | 24 | -50.00% | <0.0001 | vs. <i>glp-1</i> |
| <i>glp-1 (e2141) mxl-2 (tm1516)</i>                                             |  | 17 | -50.00% | 104/125 | 29 | -39.58% | <0.0001 | vs. <i>glp-1</i> |
| <i>glp-1(e2141) mml-1(ok849);sqIs19[hlh-30p::hlh-30::GFP + rol-6(su1006)]</i>   |  | 16 | -52.94% | 69/125  | 24 | -50.00% | <0.0001 | vs. <i>glp-1</i> |
| <i>glp-1(e2141) mxl-2(tm1516); sqIs19[hlh-30p::hlh-30::GFP + rol-6(su1006)]</i> |  | 16 | -52.94% | 92/125  | 25 | -47.92% | <0.0001 | vs. <i>glp-1</i> |

### *lars-1* knockdown lifespan

*lars-1* knockdown fails to rescue the shortevity of *glp-1mml-1* and *glp-1mxl-2*

|                      |            |    |        |        |    |        |         |                        |
|----------------------|------------|----|--------|--------|----|--------|---------|------------------------|
| N2                   | L4440::Luc | 25 |        | 71/120 | 32 |        |         |                        |
| <i>glp-1 (e2141)</i> | L4440::Luc | 28 | 12.00% | 67/120 | 38 | 18.75% | <0.0001 | vs. N2<br>(L4440::Luc) |

|                                    |            |    |         |        |    |         |         |                                  |
|------------------------------------|------------|----|---------|--------|----|---------|---------|----------------------------------|
| <i>glp-1 (e2141) mml-1 (ok849)</i> | L4440::Luc | 17 | -39.29% | 49/120 | 19 | -50.00% | <0.0001 | vs. <i>glp-1</i><br>(L4440::Luc) |
| N2                                 | lars-1     | 19 | -24.00% | 52/120 | 38 | 18.75%  | 0.0961  | vs. N2<br>(L4440::Luc)           |
| <i>glp-1 (e2141)</i>               | lars-1     | 25 | -10.71% | 54/120 | 33 | -13.16% | <0.0001 | vs. <i>glp-1</i><br>(L4440::Luc) |
| <i>glp-1 (e2141) mml-1 (ok849)</i> | lars-1     | 17 | -32.00% | 44/120 | 22 | -33.33% | <0.0001 | vs. <i>glp-1</i><br>(lars-1)     |

|                                     |            |    |         |        |    |         |         |                                  |
|-------------------------------------|------------|----|---------|--------|----|---------|---------|----------------------------------|
| N2                                  | L4440::Luc | 20 |         | 77/125 | 26 |         |         |                                  |
| <i>glp-1 (e2141)</i>                | L4440::Luc | 26 | 30.00%  | 78/125 | 36 | 38.46%  | <0.0001 | vs. N2<br>(L4440::Luc)           |
| <i>glp-1 (e2141) mxl-2 (tm1516)</i> | L4440::Luc | 15 | -42.31% | 93/125 | 17 | -52.78% | <0.0001 | vs. <i>glp-1</i><br>(L4440::Luc) |
| N2                                  | lars-1     | 15 | -25.00% | 60/125 | 27 | 3.85%   | <0.0001 | vs. N2<br>(L4440::Luc)           |
| <i>glp-1 (e2141)</i>                | lars-1     | 26 | 0.00%   | 73/125 | 30 | -16.67% | NS      | vs. <i>glp-1</i><br>(L4440::Luc) |
| <i>glp-1 (e2141) mxl-2 (tm1516)</i> | lars-1     | 15 | -42.31% | 56/125 | 26 | -13.33% | <0.0001 | vs. <i>glp-1</i><br>(lars-1)     |

### ***raga-1* lifespan**

*raga-1* deletion fails to rescue the *glp-1mxl-2* shortevity.

|                                                   |  |    |         |         |    |         |         |                  |
|---------------------------------------------------|--|----|---------|---------|----|---------|---------|------------------|
| N2                                                |  | 22 |         | 56/120  | 32 |         |         |                  |
| <i>mxl-2 (tm1516)</i>                             |  | 13 | -40.91% | 71/120  | 32 | 0.00%   | 0.0354  | vs. N2           |
| <i>raga-1 (ok701)</i>                             |  | 27 | 22.73%  | 60/120  | 39 | 21.88%  | <0.0001 | vs. N2           |
| <i>glp-1 (e2141)</i>                              |  | 36 | 63.64%  | 75/120  | 52 | 62.50%  | <0.0001 | vs. N2           |
| <i>glp-1 (e2141) mxl-2 (tm1516)</i>               |  | 18 | -50.00% | 105/120 | 25 | -51.92% | <0.0001 | vs. <i>glp-1</i> |
| <i>glp-1(e2141);raga-1(ok701)</i>                 |  | 32 | -11.11% | 53/85   | 49 | -5.77%  | 0.0006  | vs. <i>glp-1</i> |
| <i>glp-1 (e2141) mxl-2 (tm1516);raga-1(ok701)</i> |  | 20 | -44.44% | 50/120  | 27 | -48.08% | <0.0001 | vs. <i>glp-1</i> |

|                                                   |  |    |         |         |    |         |         |                  |
|---------------------------------------------------|--|----|---------|---------|----|---------|---------|------------------|
| N2                                                |  | 27 |         | 69/120  | 34 |         |         |                  |
| <i>mxl-2 (tm1516)</i>                             |  | 18 | -33.33% | 101/120 | 34 | 0.00%   | <0.0001 | vs. N2           |
| <i>raga-1 (ok701)</i>                             |  | 27 | 0.00%   | 101/120 | 38 | 11.76%  | NS      | vs. N2           |
| <i>glp-1 (e2141)</i>                              |  | 41 | 51.85%  | 58/120  | 59 | 73.53%  | <0.0001 | vs. N2           |
| <i>glp-1 (e2141) mxl-2 (tm1516)</i>               |  | 21 | -48.78% | 89/120  | 29 | -50.85% | <0.0001 | vs. <i>glp-1</i> |
| <i>glp-1(e2141);raga-1(ok701)</i>                 |  | 34 | -17.07% | 84/120  | 41 | -30.51% | <0.0001 | vs. <i>glp-1</i> |
| <i>glp-1 (e2141) mxl-2 (tm1516);raga-1(ok701)</i> |  | 15 | -63.41% | 70/120  | 18 | -69.49% | <0.0001 | vs. <i>glp-1</i> |

### ***glp-1* lifespan**

*hlh-30* is required for *glp-1* longevity.

|                                       |  |    |         |         |    |         |         |                  |
|---------------------------------------|--|----|---------|---------|----|---------|---------|------------------|
| N2                                    |  | 24 |         | 40/120  | 31 |         |         |                  |
| <i>hlh-30 (tm1978)</i>                |  | 17 | -29.17% | 53/120  | 26 | -16.13% | 0.0001  | vs. N2           |
| <i>glp-1 (e2141)</i>                  |  | 26 | 8.33%   | 67/120  | 43 | 38.71%  | 0.0146  | vs. N2           |
| <i>glp-1 (e2141); hlh-30 (tm1978)</i> |  | 24 | -7.69%  | 105/120 | 33 | -23.26% | <0.0001 | vs. <i>glp-1</i> |

|                        |  |    |       |        |    |         |        |        |
|------------------------|--|----|-------|--------|----|---------|--------|--------|
| N2                     |  | 26 |       | 41/120 | 41 |         |        |        |
| <i>hlh-30 (tm1978)</i> |  | 26 | 0.00% | 33/120 | 33 | -19.51% | 0.0028 | vs. N2 |

|                                                           |               |    |         |         |    |         |         |                               |
|-----------------------------------------------------------|---------------|----|---------|---------|----|---------|---------|-------------------------------|
| <i>glp-1 (e2141)</i>                                      |               | 35 | 34.62%  | 50/120  | 50 | 21.95%  | <0.0001 | vs. N2                        |
| <i>glp-1 (e2141); hllh-30 (tm1978)</i>                    |               | 19 | -45.71% | 30/120  | 30 | -40.00% | <0.0001 | vs. <i>glp-1</i>              |
| <hr/>                                                     |               |    |         |         |    |         |         |                               |
| N2                                                        |               | 24 |         | 83/150  | 45 |         |         |                               |
| <i>hllh-30 (tm1978)</i>                                   |               | 20 | -16.67% | 67/150  | 30 | -33.33% | <0.0001 | vs. N2                        |
| <i>glp-1 (e2141)</i>                                      |               | 41 | 70.83%  | 71/150  | 62 | 37.78%  | <0.0001 | vs. N2                        |
| <i>glp-1 (e2141); hllh-30 (tm1978)</i>                    |               | 24 | -41.46% | 140/150 | 30 | -51.61% | <0.0001 | vs. <i>glp-1</i>              |
| <hr/>                                                     |               |    |         |         |    |         |         |                               |
| <b><i>glp-1</i> lifespan</b>                              |               |    |         |         |    |         |         |                               |
| <i>mdl-1/mxl-1</i> is required for <i>glp-1</i> longevity |               |    |         |         |    |         |         |                               |
| <hr/>                                                     |               |    |         |         |    |         |         |                               |
| N2                                                        |               | 26 |         | 91/120  | 37 |         |         |                               |
| <i>mdl-1 (tm311)</i>                                      |               | 16 | -38.46% | 93/120  | 26 | -29.73% | <0.0001 | vs. N2                        |
| <i>mxl-1 (tm1530)</i>                                     |               | 26 | 0.00%   | 96/120  | 35 | -5.41%  | NS      | vs. N2                        |
| <i>glp-1 (e2141)</i>                                      |               | 35 | 34.62%  | 100/120 | 65 | 75.68%  | <0.0001 | vs. N2                        |
| <i>glp-1 (e2141);mdl-1 (tm311)</i>                        |               | 11 | -68.57% | 64/120  | 33 | -49.23% | <0.0001 | vs. <i>glp-1</i>              |
| <i>glp-1 (e2141);mxl-1 (tm1530)</i>                       |               | 19 | -45.71% | 101/120 | 37 | -43.08% | <0.0001 | vs. <i>glp-1</i>              |
| <hr/>                                                     |               |    |         |         |    |         |         |                               |
| N2                                                        |               | 24 |         | 104/120 | 40 |         |         |                               |
| <i>mdl-1 (tm311)</i>                                      |               | 15 | -37.50% | 97/120  | 26 | -35.00% | <0.0001 | vs. N2                        |
| <i>mxl-1 (tm1530)</i>                                     |               | 24 | 0.00%   | 94/120  | 38 | -5.00%  | NS      | vs. N2                        |
| <i>glp-1 (e2141)</i>                                      |               | 37 | 54.17%  | 105/120 | 54 | 35.00%  | <0.0001 | vs. N2                        |
| <i>glp-1 (e2141);mdl-1 (tm311)</i>                        |               | 12 | -67.57% | 99/120  | 26 | -51.85% | <0.0001 | vs. <i>glp-1</i>              |
| <i>glp-1 (e2141);mxl-1 (tm1530)</i>                       |               | 12 | -65.7%  | 43/120  | 37 | -31.48% | <0.0001 | vs. <i>glp-1</i>              |
| <hr/>                                                     |               |    |         |         |    |         |         |                               |
| N2                                                        |               | 23 |         | 94/122  | 32 |         |         |                               |
| <i>mdl-1 (tm311)</i>                                      |               | 13 | -43.48% | 109/150 | 32 | 0.00%   | <0.0001 | vs. N2                        |
| <i>mxl-1 (tm1530)</i>                                     |               | 20 | -13.04% | 83/120  | 32 | 0.00%   | NS      | vs. N2                        |
| <i>glp-1 (e2141)</i>                                      |               | 32 | 39.13%  | 89/160  | 48 | 50.00%  | <0.0001 | vs. N2                        |
| <i>glp-1 (e2141);mdl-1 (tm311)</i>                        |               | 11 | -65.63% | 99/121  | 25 | -47.92% | <0.0001 | vs. <i>glp-1</i>              |
| <i>glp-1 (e2141);mxl-1 (tm1530)</i>                       |               | 11 | -59.38% | 129/160 | 32 | -33.33% | <0.0001 | vs. <i>glp-1</i>              |
| <hr/>                                                     |               |    |         |         |    |         |         |                               |
| <b>Candidate lifespan from RNA-seq</b>                    |               |    |         |         |    |         |         |                               |
| RNAi treatment from egg onward.                           |               |    |         |         |    |         |         |                               |
| <hr/>                                                     |               |    |         |         |    |         |         |                               |
| N2                                                        | L4440::Luc    | 21 |         | 70/120  | 32 |         |         |                               |
| <i>glp-1 (e2141)</i>                                      | L4440::Luc    | 32 | 52.38%  | 90/120  | 47 | 46.88%  | <0.0001 | vs. N2 (L4440::Luc)           |
| N2                                                        | <i>fat-5</i>  | 17 | -19.05% | 60/120  | 27 | -15.63% | <0.0001 | vs. N2 (L4440::Luc)           |
| <i>glp-1 (e2141)</i>                                      | <i>fat-5</i>  | 12 | -62.50% | 88/120  | 21 | -55.32% | <0.0001 | vs. <i>glp-1</i> (L4440::Luc) |
| N2                                                        | <i>swt-1</i>  | 25 | 19.05%  | 78/120  | 34 | 6.25%   | NS      | vs. N2 (L4440::Luc)           |
| <i>glp-1 (e2141)</i>                                      | <i>swt-1</i>  | 25 | -21.88% | 87/120  | 41 | -12.77% | <0.0001 | vs. <i>glp-1</i> (L4440::Luc) |
| N2                                                        | <i>ugt-53</i> | 21 | 0.00%   | 83/120  | 32 | -31.91% | NS      | vs. N2 (L4440::Luc)           |
| <i>glp-1 (e2141)</i>                                      | <i>ugt-53</i> | 25 | -21.88% | 82/120  | 36 | -23.40% | <0.0001 | vs. <i>glp-1</i> (L4440::Luc) |
| <hr/>                                                     |               |    |         |         |    |         |         |                               |



RNAi treatment during adulthood

|                      |               |    |         |         |    |         |         |                               |
|----------------------|---------------|----|---------|---------|----|---------|---------|-------------------------------|
| N2                   | L4440::Luc    | 22 |         | 83/120  | 36 |         |         |                               |
| <i>glp-1 (e2141)</i> | L4440::Luc    | 31 | 40.91%  | 82/120  | 47 | 30.56%  | <0.0001 | vs. N2 (L4440::Luc)           |
| N2                   | <i>fat-5</i>  | 17 | -22.73% | 101/120 | 29 | -19.44% | <0.0001 | vs. N2 (L4440::Luc)           |
| <i>glp-1 (e2141)</i> | <i>fat-5</i>  | 24 | -22.58% | 108/120 | 43 | -8.51%  | <0.0001 | vs. <i>glp-1</i> (L4440::Luc) |
| N2                   | <i>swt-1</i>  | 24 | 9.09%   | 111/120 | 33 | -8.33%  | NS      | vs. N2 (L4440::Luc)           |
| <i>glp-1 (e2141)</i> | <i>swt-1</i>  | 29 | -6.45%  | 88/120  | 38 | -19.15% | 0.0265  | vs. <i>glp-1</i> (L4440::Luc) |
| N2                   | <i>ugt-53</i> | 22 | 0.00%   | 77/120  | 31 | -13.89% | NS      | vs. N2 (L4440::Luc)           |
| <i>glp-1 (e2141)</i> | <i>ugt-53</i> | 33 | 6.45%   | 83/120  | 43 | -8.51%  | NS      | vs. <i>glp-1</i> (L4440::Luc) |

***fat-5* mutant lifespan**

*fat-5* deletion suppresses *glp-1* longevity.

|                                     |  |    |         |         |    |         |         |                  |
|-------------------------------------|--|----|---------|---------|----|---------|---------|------------------|
| N2                                  |  | 21 |         | 49/120  | 32 |         |         |                  |
| <i>fat-5 (tm420)</i>                |  | 14 | -33.33% | 62/120  | 35 | 9.38%   | NS      | vs. N2           |
| <i>glp-1 (e2141)</i>                |  | 32 | 52.38%  | 71/120  | 46 | 43.75%  | <0.0001 | vs. N2           |
| <i>glp-1 (e2141); fat-5 (tm420)</i> |  | 18 | -43.75% | 114/120 | 39 | -15.22% | <0.0001 | vs. <i>glp-1</i> |

|                                     |  |    |         |         |    |         |         |                  |
|-------------------------------------|--|----|---------|---------|----|---------|---------|------------------|
| N2                                  |  | 20 |         | 51/120  | 31 |         |         |                  |
| <i>fat-5 (tm420)</i>                |  | 17 | -15.00% | 55/120  | 29 | -6.45%  | NS      | vs. N2           |
| <i>glp-1 (e2141)</i>                |  | 31 | 55.00%  | 71/120  | 45 | 45.16%  | <0.0001 | vs. N2           |
| <i>glp-1 (e2141); fat-5 (tm420)</i> |  | 10 | -67.74% | 108/120 | 38 | -15.56% | <0.0001 | vs. <i>glp-1</i> |

***mdl-1*::GFP rescue lifespan**

*mdl-1* overexpression partially rescue the shortevity of *glp-1mml-1* and *glp-1mxl-2*

|                                                                                   |  |    |         |         |    |         |         |                  |
|-----------------------------------------------------------------------------------|--|----|---------|---------|----|---------|---------|------------------|
| N2                                                                                |  | 25 |         | 62/120  | 36 |         |         |                  |
| <i>glp-1(e2141)</i>                                                               |  | 34 | 36.00%  | 92/120  | 53 | 47.22%  | <0.0001 | vs. N2           |
| <i>glp-1(e2141) mml-1(ok849)</i>                                                  |  | 18 | -47.06% | 64/120  | 22 | -58.49% | <0.0001 | vs. <i>glp-1</i> |
| <i>glp-1(e2141) mxl-2(tm1516)</i>                                                 |  | 18 | -47.06% | 94/120  | 25 | -52.83% | <0.0001 | vs. <i>glp-1</i> |
| <i>glp-1(e2141); wglS106[mdl-1::TY1::EGFP::3xFLAG + unc-119(+)]</i>               |  | 36 | 5.88%   | 86/120  | 55 | 3.77%   | NS      | vs. <i>glp-1</i> |
| <i>glp-1(e2141) mml-1(ok849); wglS106[mdl-1::TY1::EGFP::3xFLAG + unc-119(+)]</i>  |  | 25 | -26.47% | 100/120 | 43 | -18.87% | <0.0001 | vs. <i>glp-1</i> |
| <i>glp-1(e2141) mxl-2(tm1516); wglS106[mdl-1::TY1::EGFP::3xFLAG + unc-119(+)]</i> |  | 27 | -20.59% | 64/120  | 43 | -18.87% | <0.0001 | vs. <i>glp-1</i> |

|                     |  |    |         |         |    |        |         |        |
|---------------------|--|----|---------|---------|----|--------|---------|--------|
| N2                  |  | 18 |         | 94/120  | 35 |        |         |        |
| <i>glp-1(e2141)</i> |  | 40 | 122.22% | 102/120 | 51 | 45.71% | <0.0001 | vs. N2 |

|                                                                                   |    |         |         |    |         |         |                  |
|-----------------------------------------------------------------------------------|----|---------|---------|----|---------|---------|------------------|
| <i>glp-1(e2141) mml-1(ok849)</i>                                                  | 14 | -65.00% | 94/120  | 23 | -54.90% | <0.0001 | vs. <i>glp-1</i> |
| <i>glp-1(e2141) mxl-2(tm1516)</i>                                                 | 18 | -5.00%  | 104/120 | 23 | -54.90% | <0.0001 | vs. <i>glp-1</i> |
| <i>glp-1(e2141); wgIs106[mdl-1::TY1::EGFP::3xFLAG + unc-119(+)]</i>               | 42 | 5.00%   | 59/120  | 47 | -7.84%  | NS      | vs. <i>glp-1</i> |
| <i>glp-1(e2141) mml-1(ok849); wgIs106[mdl-1::TY1::EGFP::3xFLAG + unc-119(+)]</i>  | 23 | -42.50% | 105/120 | 35 | -31.37% | <0.0001 | vs. <i>glp-1</i> |
| <i>glp-1(e2141) mxl-2(tm1516); wgIs106[mdl-1::TY1::EGFP::3xFLAG + unc-119(+)]</i> | 23 | -42.50% | 106/120 | 37 | -27.45% | <0.0001 | vs. <i>glp-1</i> |

### ***mdl-1* overexpression lifespan**

*mdl-1* overexpression extends wild type lifespan.

|                                                       |    |        |        |    |        |         |        |
|-------------------------------------------------------|----|--------|--------|----|--------|---------|--------|
| N2                                                    | 18 |        | 94/120 | 35 |        |         |        |
| <i>wgIs106[mdl-1::TY1::EGFP::3xFLAG + unc-119(+)]</i> | 26 | 44.44% | 78/120 | 44 | 25.71% | <0.0001 | vs. N2 |

|                                                       |    |        |        |    |        |        |        |
|-------------------------------------------------------|----|--------|--------|----|--------|--------|--------|
| N2                                                    | 22 |        | 72/120 | 34 |        |        |        |
| <i>wgIs106[mdl-1::TY1::EGFP::3xFLAG + unc-119(+)]</i> | 27 | 22.73% | 59/120 | 42 | 23.53% | 0.0009 | vs. N2 |

\* no. of dead animals/total no. of animals analyzed

P values were calculated by the Mantel-Cox Log Rank test.

**Supplementary Table 2: Strain Lists.**

| Strains | Genotype                                                                                    | Experiments                                     |
|---------|---------------------------------------------------------------------------------------------|-------------------------------------------------|
|         | N2 (WT)                                                                                     |                                                 |
| AA3234  | <i>mml-1(ok849)III</i>                                                                      | The strain was outcrossed 3 times to N2         |
| AA3235  | <i>mxl-2(tm1516)III</i>                                                                     | The strain was outcrossed 3 times to N2         |
| AA3561  | <i>glp-1(e2141ts)III</i>                                                                    |                                                 |
| AA3232  | <i>glp-1(e2141) mml-1(ok849)III</i>                                                         |                                                 |
| AA3560  | <i>glp-1(e2141ts) mxl-2(tm1516)III</i>                                                      |                                                 |
| CB1370  | <i>daf-2(e1370)III</i>                                                                      |                                                 |
| AA3407  | <i>daf-2 (e1370) mml-1 (ok849)III</i>                                                       |                                                 |
| AA3408  | <i>daf-2(e1370) mxl-2(tm1516)III</i>                                                        |                                                 |
| MQ887   | <i>isp-1(qm150)IV</i>                                                                       |                                                 |
| AA3409  | <i>mml-1(ok849)III; isp-1 (qm150)IV</i>                                                     |                                                 |
| AA3410  | <i>mxl-2(tm1516)III; isp-1(qm150)IV</i>                                                     |                                                 |
| AA3301  | <i>dhEx966 (mml-1p::mml-1::GFP, myo-2p::mCherry)</i>                                        | used for MML-1::GFP quantification and lifespan |
| AA3302  | <i>dhEx967(mml-1p::mml-1::GFP, myo-2p::mCherry)</i>                                         | used for MML-1::GFP quantification and lifespan |
| AA3383  | <i>glp-1; dhEx966(mml-1p::mml-1::GFP, myo-2p::mCherry)</i>                                  | used for MML-1::GFP quantification and lifespan |
| AA3384  | <i>glp-1; dhEx967(mml-1p::mml-1::GFP, myo-2p::mCherry)</i>                                  | used for MML-1::GFP quantification and lifespan |
| OP198   | <i>wgIs198 [mml-1::TY1::EGFP::3xFLAG(92C12) + unc-119(+)]</i>                               | used for MML-1::GFP quantification and lifespan |
| AA3771  | <i>glp-1(e2141)III; wgIs198 [mml-1::TY1::EGFP::3xFLAG(92C12) + unc-119(+)]</i>              | used for MML-1::GFP quantification and lifespan |
| AA3429  | <i>glp-1(e2141) mml-1(ok849)III; dhEx966(mml-1a::GFP, myo-2p::mCherry)</i>                  | used for rescue lifespan                        |
| AA3402  | <i>glp-1(e2141) mml-1(ok849)III; dhEx967(mml-1a::GFP, myo-2p::mCherry)</i>                  | used for rescue lifespan                        |
| AA3762  | <i>glp-1(e2141) mml-1(ok849) III; wgIs198[mml-1::TY1::EGFP::3xFLAG(92C12) + unc-119(+)]</i> | used for rescue lifespan                        |
| AA3848  | <i>N2; dhEx1035(mx1-2::GFP, myo-2p::mCherry)</i>                                            | MXL-2::GFP quantification                       |
| AA3911  | <i>glp-1(e2141)III; dhEx1035(mx1-2p::mx1-2::GFP; myo-2p::mCherry)</i>                       | MXL-2::GFP quantification                       |
| AA3923  | <i>glp-1(e2141) mxl-2(tm1516)III; dhEx1035(mx1-2::GFP, myo-2p::mCherry)</i>                 |                                                 |
| MAH235  | <i>sqIs19[h1h-30p::h1h-30::GFP + rol-6(su1006)]</i>                                         | HLH-30::GFP nuclear localization assay          |
| AA3572  | <i>glp-1(e2141)III; sqIs19[h1h-30p::h1h-30::GFP + rol-6(su1006)]</i>                        | HLH-30::GFP nuclear localization assay          |
| AA3570  | <i>glp-1(e2141) mml-1(ok849)III; sqIs19[h1h-30p::h1h-30::GFP + rol-6(su1006)]</i>           | HLH-30::GFP nuclear localization assay          |
| AA3571  | <i>glp-1(e2141) mxl-2(tm1516)III; sqIs19[h1h-30p::h1h-30::GFP + rol-6(su1006)]</i>          | HLH-30::GFP nuclear localization assay          |
| AA4036  | <i>eat-2(ad465)II; sqIs19[h1h-30p::h1h-30::GFP + rol-6(su1006)]</i>                         | HLH-30::GFP nuclear localization assay          |
| AA3961  | <i>daf-2 (e1370)III; sqIs19[h1h-30p::h1h-30::GFP + rol-6(su1006)]</i>                       | HLH-30::GFP nuclear localization assay          |
| DA2123  | <i>adIs2122[lgg-1::GFP; rol-6(su1006)]</i>                                                  | LGG-1::GFP puncta counting                      |
| AA3256  | <i>glp-1(e2141)III; adIs2122[lgg-1::GFP + rol-6(su1006)]</i>                                | LGG-1::GFP puncta counting                      |
| AA3299  | <i>glp-1(e2141) mml-1(ok849)III; adIs2122[lgg-1::GFP; rol-6(su1006)]</i>                    | LGG-1::GFP puncta counting                      |
| AA3386  | <i>glp-1(e2141) mxl-2 (tm1516)III; adIs2122[lgg-1::GFP + rol-6(su1006)]</i>                 | LGG-1::GFP puncta counting                      |
| RT258   | <i>unc-119(ed3) III; pwIs50pwIs50 [lmp-1::GFP + Cbr-unc-119(+)].</i>                        | LMP-1::GFP Western Blotting                     |
| AA3575  | <i>glp-1(e2141)III; pwIs50pwIs50[lmp-1::GFP + Cbr-unc-119(+)].</i>                          | LMP-1::GFP Western Blotting                     |
| AA3573  | <i>glp-1(e2141); mml-1(ok849)III; pwIs50pwIs50 [lmp-1::GFP + Cbr-unc-119(+)].</i>           | LMP-1::GFP Western Blotting                     |
| AA3574  | <i>glp-1(e2141); mxl-2(tm1516)III; pwIs50pwIs50 [lmp-1::GFP + Cbr-unc-119(+)].</i>          | LMP-1::GFP Western Blotting                     |
| VIG9    | <i>unc119(ed3)III; Is[unc-119(+); Plgg-2::gfp::lgg-2]</i>                                   | LGG-2::GFP puncta counting                      |
| AA3579  | <i>glp-1(e2141) III; Is[unc-119(+); Plgg-2::gfp::lgg-2]</i>                                 | LGG-2::GFP puncta counting                      |
| AA3577  | <i>glp-1(e2141) mml-1(ok849) III; Is[unc-119(+); Plgg-2::gfp::lgg-2]</i>                    | LGG-2::GFP puncta counting                      |
| AA3578  | <i>glp-1(e2141) mxl-2(tm1516) III; Is[unc-119(+); Plgg-2::gfp::lgg-2]</i>                   | LGG-2::GFP puncta counting                      |
| HZ589   | <i>bpIs151(T12G3.1::gfp;unc-76) IV; him-5(e1490) V</i>                                      | SQST-1/p62::GFP                                 |

|         |                                                                                       |                                                     |
|---------|---------------------------------------------------------------------------------------|-----------------------------------------------------|
|         |                                                                                       | quantification and Western Blotting                 |
| AA3564  | <i>glp-1(e2141)III; bpls151(T12G3.1::gfp;unc-76)IV; him-5(e1490)V</i>                 | SQST-1/p62::GFP quantification and Western Blotting |
| AA3562  | <i>glp-1(e2141) mml-1(ok849)III; bpls151(T12G3.1::gfp;unc-76)IV; him-5(e1490)V</i>    | SQST-1/p62::GFP quantification and Western Blotting |
| AA3563  | <i>glp-1(e2141) mxl-2(tm1516)III; bpls151(T12G3.1::gfp;unc-76)IV; him-5(e1490)V</i>   | SQST-1/p62::GFP quantification and Western Blotting |
| AA3826  | <i>mml-1(ok849)III; bpls151(T12G3.1::gfp;unc-76)IV; him-5(e1490)V</i>                 | SQST-1/p62::GFP Western Blotting                    |
| AA3827  | <i>mxl-2(tm1516)III; bpls151(T12G3.1::gfp;unc-76) IV; him-5(e1490) V</i>              | SQST-1/p62::GFP Western Blotting                    |
| AA3776  | <i>raga-1(ok701) II</i>                                                               | used for rescue lifespan                            |
| AA3732  | <i>raga-1(ok701) II; glp-1(e2141) III</i>                                             | used for rescue lifespan                            |
| AA3734  | <i>raga-1 (ok701) II; glp-1(e2141) mxl-2(tm1516) III</i>                              | used for rescue lifespan                            |
| AA3837  | <i>N2; dhEx1031(lars-1::GFP, myo-2p::mCherry)</i>                                     | LARS-1::GFP quantification                          |
| AA3863  | <i>glp-1(e2141)III; dhEx1031(lars-1::GFP, myo-2p::mCherry)</i>                        | LARS-1::GFP quantification                          |
| AA3864  | <i>glp-1(e2141) mml-1(ok849)III; dhEx1031(lars-1::GFP, myo-2p::mCherry)</i>           | LARS-1::GFP quantification                          |
| AA3865  | <i>glp-1(e2141) mxl-2(tm1516)III; dhEx1031(lars-1::GFP, myo-2p::mCherry)</i>          | LARS-1::GFP quantification                          |
| AA3658  | <i>hlh-30 (tm1978) IV</i>                                                             | The strain was outcrossed 6 times to N2             |
| AA3855  | <i>glp-1(e2141ts); hlh-30 (tm1978) IV</i>                                             |                                                     |
| AA3840  | <i>mml-1(ok849) III; hlh-30(tm1978) IV</i>                                            |                                                     |
| AA3841  | <i>mxl-2(tm1516) III; hlh-30(tm1978) IV</i>                                           |                                                     |
| AA3858  | <i>glp-1(e2141ts) mml-1(ok849) III; hlh-30(tm1978) IV</i>                             |                                                     |
| AA3859  | <i>glp-1(e2141ts) mxl-2(tm1516) III; hlh-30(tm1978) IV</i>                            |                                                     |
| OP106   | <i>unc-119(ed3) III; wgIs106[mdl-1::TY1::EGFP::3xFLAG + unc-119(+)]</i>               | The strain was outcrossed one time to N2            |
| AA3773  | <i>glp-1(e2141) III; wgIs106[mdl-1::TY1::EGFP::3xFLAG + unc-119(+)]</i>               |                                                     |
| AA3774  | <i>glp-1(e2141) mml-1(ok849) III; wgIs106[mdl-1::TY1::EGFP::3xFLAG + unc-119(+)]</i>  |                                                     |
| AA3775  | <i>glp-1(e2141) mxl-2(tm1516) III; wgIs106[mdl-1::TY1::EGFP::3xFLAG + unc-119(+)]</i> |                                                     |
| AA3774  | <i>glp-1(e2141) mml-1(ok849)III; wgIs106[mdl-1::TY1::EGFP::3xFLAG + unc-119(+)]</i>   | used for rescue lifespan                            |
| AA3775  | <i>glp-1(e2141) mxl-2(tm1516)III; wgIs106[mdl-1::TY1::EGFP::3xFLAG + unc-119(+)]</i>  | used for rescue lifespan                            |
| AA3372  | <i>mdl-1(tm311) X</i>                                                                 | The strain was outcrossed 3 times to N2             |
| AA3415  | <i>glp-1(e2141) III; mdl-1(tm311) X</i>                                               |                                                     |
| AA3373  | <i>mxl-1(tm1530)V</i>                                                                 | outcrossed 3 times to N2                            |
| AA3416  | <i>glp-1(e2141)III; mxl-1(tm1530)V</i>                                                |                                                     |
| BX107   | <i>fat-5(tm420)</i>                                                                   | outcrossed 3 times to N2                            |
| HGA8006 | <i>glp-1(e2141)III; fat-5 (tm420)V</i>                                                | outcrossed one time to N2                           |

**Supplementary Table 3: PCR Primers.**

| <b>Name</b>            | <b>Sequence</b>                | <b>Purpose</b> |
|------------------------|--------------------------------|----------------|
| <i>mml-1 ok849 f2</i>  | TTCTGCTAGATAACTTACCACC         | Genotyping     |
| <i>mml-1 ok849 r</i>   | GTCTTCACAACCACAGTATGCCACA      | Genotyping     |
| <i>mxl-2 tm1516 f</i>  | TTGGTTGGCTGACAAATTTCAATTGGAGAA | Genotyping     |
| <i>mxl-2 tm1516 r</i>  | GCCGGACGGCTCGGCGAGCTCCCCATCGG  | Genotyping     |
| <i>hlh-30 tm1978 f</i> | CCGGATGAGGACTGAAACAT           | Genotyping     |
| <i>hlh-30 tm1978 r</i> | GGCTCAGGACACTCTGGAAG           | Genotyping     |
| <i>daf-2 e1370 f</i>   | CCAGTGCTTCTGAATCGTCA           | Genotyping     |
| <i>daf-2 e1370 r</i>   | TGGAGCTTCGGAGTTGTTCT           | Genotyping     |
| <i>raga-1 ok701 f</i>  | AACTTCCTCGTCTCGCAAAA           | Genotyping     |
| <i>raga-1 ok701 r</i>  | GTCTTCGGTGAATCCGTTGT           | Genotyping     |
| <i>mdl-1 tm311 f</i>   | ACACTACCTCTCGCCGTCTGCCGCCT     | Genotyping     |
| <i>mdl-1 tm311 r</i>   | AAATGGGGTAGGTGGAAGATTCAT       | Genotyping     |
| <i>mxl-1 tm1530 f</i>  | ACATATTATTTATTAGATCTCTGTGA     | Genotyping     |
| <i>mxl-1 tm1530 r</i>  | ATGTCTTTCAAATAATGTGCAAAGTCAG   | Genotyping     |
| <i>fat-5 tm420 f</i>   | AGGCTTACCTCACCCGAAAT           | Genotyping     |
| <i>fat-5 tm420 r</i>   | CAGAAACACGCCAGAGATCA           | Genotyping     |
| <i>mml-1 f</i>         | CCGCTTGCAGTACACTTTTG           | qRT-PCR        |
| <i>mml-1 r</i>         | CGGCTCGGCGAGAATG               | qRT-PCR        |
| <i>mxl-2 f</i>         | ATCACCAGAACGCTCCTGTC           | qRT-PCR        |
| <i>mxl-2 r</i>         | TTTCCGGCTGTCGACTTGAA           | qRT-PCR        |
| <i>lgg-1 f</i>         | ACCCAGACCGTATTCCAGTG           | qRT-PCR        |
| <i>lgg-1 r</i>         | ACGAAGTTGGATGCGTTTTTC          | qRT-PCR        |
| <i>tts-1 f</i>         | CCGACACGTTTCAGACACAC           | qRT-PCR        |
| <i>tts-1 r</i>         | GGTTTTACCCATTGACTCAACC         | qRT-PCR        |
| <i>lgg-2 f</i>         | CTGCAAATTCCTAGTACCCGAG         | qRT-PCR        |
| <i>lgg-2 r</i>         | CATAGAATTGACACCATTGAGC         | qRT-PCR        |
| <i>mdl-1 f</i>         | CTGCTCTCCTTCCGCCAAT            | qRT-PCR        |
| <i>mdl-1 r</i>         | ATGAGTGCAAGGCGAATGG            | qRT-PCR        |
| <i>swt-1 f</i>         | TGTCCAGCTCGCCCTCTT             | qRT-PCR        |
| <i>swt-1 r</i>         | TTCTAACGGGCTCTTCTCATTCTC       | qRT-PCR        |
| <i>atg-2 f</i>         | TCATCTGCAGCTGGTATAGTAGGTATG    | qRT-PCR        |
| <i>atg-2 r</i>         | CGGCGAGACTTTGCACAA             | qRT-PCR        |
| <i>epg-9 f</i>         | GACGCCGTTGAATGCATCT            | qRT-PCR        |
| <i>epg-9 r</i>         | GGAACCTTCCAAGTGTCTGTGA         | qRT-PCR        |
| <i>atg-9 f</i>         | GCCAACACAAACGTGACAAGTC         | qRT-PCR        |
| <i>atg-9 r</i>         | TCCGAAATGCCGTTTTCC             | qRT-PCR        |
| <i>ctns-1 f</i>        | AAAGCGTCGTCGGGCTAA             | qRT-PCR        |
| <i>ctns-1 r</i>        | ATGCACAAAATCCGACAAGGT          | qRT-PCR        |
| <i>pyk-1 f</i>         | GGCGGTGCTTCTGCTGAA             | qRT-PCR        |
| <i>pyk-1 r</i>         | GTGGATCAGTAGTCAAACGGATTG       | qRT-PCR        |
| <i>tps-1 f</i>         | AAAGTGCCAACACCCGTTTTT          | qRT-PCR        |
| <i>tps-1 r</i>         | CCTCGTGGGAGCTGTTTCC            | qRT-PCR        |
| <i>cpr-1 f</i>         | GCTGCCCACTCCGATGAA             | qRT-PCR        |
| <i>cpr-1 r</i>         | GGGACAGAGGCGAGAACAAC           | qRT-PCR        |
| <i>unc-51 f</i>        | TTAGGTCATGGAGCATTGCAA          | qRT-PCR        |
| <i>unc-51 r</i>        | GGCACGTCTGTGCGATCA             | qRT-PCR        |
| <i>sams-1 f</i>        | AAGACCTGCAACGTGCTTGTT          | qRT-PCR        |
| <i>sams-1 r</i>        | AACTCCGGCAGCAATTTCTG           | qRT-PCR        |

|                       |                            |         |
|-----------------------|----------------------------|---------|
| <i>pept-1 f</i>       | CCCAGTCGCTGCCAAGTG         | qRT-PCR |
| <i>pept-1 r</i>       | AAGCCCTCCAGTGACCATTTT      | qRT-PCR |
| <i>asm-3 f</i>        | CGCGCCATGCAACGA            | qRT-PCR |
| <i>asm-3 r</i>        | ACGGGCGTCGCAAAGATA         | qRT-PCR |
| <i>lars-1/R74.1 f</i> | GATTGGCGTCGTTTCTTCA        | qRT-PCR |
| <i>lars-1/R74.1 r</i> | CGGACGAATGAGTCGAAGTATG     | qRT-PCR |
| <i>mars-1 f</i>       | GTCGTTGTGCTTTGCAATCTG      | qRT-PCR |
| <i>mars-1 r</i>       | CCATGGCTCGGGACTCTACTC      | qRT-PCR |
| <i>fat-5 f</i>        | GGTCGGACTATATCAGCTTGTG     | qRT-PCR |
| <i>fat-5 r</i>        | CATGAGAGGGTGGCTTTGTAG      | qRT-PCR |
| <i>gpdh-1 f</i>       | GGAGCCCACGCGATCTC          | qRT-PCR |
| <i>gpdh-1 r</i>       | CCCCGTTCTCACAGCTTGA        | qRT-PCR |
| <i>cdc-42 f</i>       | CTGCTGGACAGGAAGATTACG      | qRT-PCR |
| <i>cdc-42 r</i>       | CTCGGACATTCTCGAATGAAG      | qRT-PCR |
| <i>ama-1 f</i>        | GGATGGAATGTGGGTTGAGA       | qRT-PCR |
| <i>ama-1 r</i>        | CGGATTCTTGAATTTTCGCGC      | qRT-PCR |
| <i>SQSTM1 f</i>       | TTCTTTTCCCTCCGTGCTC        | qRT-PCR |
| <i>SQSTM1 r</i>       | GGATCCGAGTGTGAATTTCC       | qRT-PCR |
| <i>VPS11 f</i>        | ATCCAGAACTTGC GGATCA       | qRT-PCR |
| <i>VPS11 r</i>        | ACCATCTCTACAGCAAGGGC       | qRT-PCR |
| <i>TFEB f</i>         | CCAGAAGCGAGAGCTCACAGAT     | qRT-PCR |
| <i>TFEB r</i>         | TGTGATTGTCTTTCTTCTGCCG     | qRT-PCR |
| <i>ATP6V1H f</i>      | GGAAGTGCAGATGATCCCCA       | qRT-PCR |
| <i>ATP6V1H r</i>      | CCGTTTGCTCGTGGATAAT        | qRT-PCR |
| <i>CTSB f</i>         | AGTGGAGAATGGCACACCCTA      | qRT-PCR |
| <i>CTSB r</i>         | AAGAAGCCATTGTCACCCCA       | qRT-PCR |
| <i>CTSF f</i>         | ACAGAGGAGGAGTTCCGCACTA     | qRT-PCR |
| <i>CTSF r</i>         | GCTTGCTTCATCTTGTTGCCA      | qRT-PCR |
| <i>GAPDH f</i>        | TGCACCACCAACTGCTTAGC       | qRT-PCR |
| <i>GAPDH r</i>        | GGCATGGACTGTGGTCATGAG      | qRT-PCR |
| <i>MonodoA f</i>      | TGA GAT GTG CTT CAT CTG CC | qRT-PCR |
| <i>MonodoA r</i>      | CAGAGCCCCAGTCCTCAA         | qRT-PCR |
| <i>ChREBP f</i>       | GTCACGAAGCCACACACG         | qRT-PCR |
| <i>ChREBP r</i>       | GAGACAAGATCCGCCTGA AC      | qRT-PCR |
| <i>UVRAG f</i>        | TGGAGTCCCTAGTCCATGTTG      | qRT-PCR |
| <i>UVRAG r</i>        | AGGAGGGGAGAAGTTGCAGT       | qRT-PCR |
| <i>WIPI 149 f</i>     | GCACAATCTCCCCTGAAGTC       | qRT-PCR |
| <i>WIPI 149 r</i>     | CCTCCTGGATATTCCTGCAA       | qRT-PCR |
| <i>CLCN7 f</i>        | TGATCTCCACGTTACCCCTGA      | qRT-PCR |
| <i>CLCN7 r</i>        | TCTCCGAGTCAAACCTTCCGA      | qRT-PCR |
| <i>LAMP1 f</i>        | ACGTTACAGCGTCCAGCTCAT      | qRT-PCR |
| <i>LAMP1 r</i>        | TCTTTGGAGCTCGCATTGG        | qRT-PCR |
| <i>MCOLN1 f</i>       | TTGCTCTCTGCCAGCGGTACTA     | qRT-PCR |
| <i>MCOLN1 r</i>       | GCAGTCAGTAACCACCATCGGA     | qRT-PCR |
| <i>VPS18 f</i>        | TCATCCTTACGTCCCAGCTC       | qRT-PCR |
| <i>VPS18 r</i>        | AATCAGCTGTGCATGAGCCT       | qRT-PCR |
| <i>ATP6Voe1 f</i>     | CATTGTGATGAGCGTGTCTGG      | qRT-PCR |
| <i>ATP6Voe1 r</i>     | AACTCCCCGGTTAGGACCCTTA     | qRT-PCR |

**Supplementary Table 4: The Numbers of Differentially Expressed Genes in Different Comparisons.**

| <b>Comparison*</b>                                                                                                            | <b>Total no. of Differentially Expressed Genes (DEG)</b> | <b>No. of upregulated DEG*</b> | <b>No. of downregulated DEG*</b> |
|-------------------------------------------------------------------------------------------------------------------------------|----------------------------------------------------------|--------------------------------|----------------------------------|
| <i>mml-1</i> vs N2                                                                                                            | 239                                                      | 108                            | 131                              |
| <i>mxl-2</i> vs N2                                                                                                            | 1913                                                     | 1174                           | 739                              |
| <i>hlh-30</i> vs N2                                                                                                           | 381                                                      | 291                            | 90                               |
| <i>glp-1</i> vs N2                                                                                                            | 10806                                                    | 4944                           | 5862                             |
| <i>glp-1;hlh-30</i> vs <i>glp-1</i>                                                                                           | 543                                                      | 206                            | 337                              |
| <i>glp-1 mml-1</i> vs <i>glp-1</i>                                                                                            | 1360                                                     | 670                            | 692                              |
| <i>glp-1 mxl-2</i> vs <i>glp-1</i>                                                                                            | 1585                                                     | 730                            | 855                              |
| Intersection of <i>mml-1</i> vs N2 and <i>mxl-2</i> vs N2                                                                     | 165                                                      | 67                             | 90                               |
| Intersection of <i>glp-1mml-1</i> vs <i>glp-1</i> and <i>glp-1mxl-2</i> vs <i>glp-1</i>                                       | 827                                                      | 445                            | 382                              |
| Intersection of <i>glp-1;hlh-30</i> vs <i>glp-1</i> , <i>glp-1mml-1</i> vs <i>glp-1</i> and <i>glp-1mxl-2</i> vs <i>glp-1</i> | 230                                                      | 96                             | 106                              |

\* In genotype A vs. genotype B, no. of upregulated or downregulated genes in genotype A compared to genotype B were counted.
